# 1 **EnvRtype: a software to interplay enviromics and quantitative**

## 2 **genomics in agriculture**

3  
4 Germano Costa-Neto\*, Giovanni Galli<sup>\*</sup>, Humberto Fanelli<sup>\*</sup>, José Crossa<sup>†</sup>,, and Roberto Fritsche-Neto\*

5 <sup>1</sup> Department of Genetics, “Luiz de Queiroz” Agriculture College, University of São Paulo, São Paulo,  
6 Brazil. E-mail: [germano.cneto@usp.br](mailto:germano.cneto@usp.br) (<http://orcid.org/0000-0003-1137-6786>);

7 <sup>2</sup> Biometrics and Statistics Unit, Genetic Resources Program, and Global Wheat Program, International  
8 Maize and Wheat Improvement Center (CIMMYT), Texcoco, Mexico. E-mail: [j.crossa@cgiar.org](mailto:j.crossa@cgiar.org)

9  
10 **Running Title:** Envirotyping Software for Genomics

### 11 **Key-words**

12 *G×E*: genotype × environment interaction;

13 *EnvRtype*: Envirotyping and Enviromics in R;

14 *BGGE*: Bayesian Genomic Genotype × Environment Interaction;

15

16 Correpnding Author: Germano Costa-Neto ([germano.cneto@usp.br](mailto:germano.cneto@usp.br))

## 17 **ABSTRACT**

18 Envirotyping is a core of techniques used to unfold the non-genetic drivers associated with the  
19 phenotypic adaptation of living organisms. Here we introduce the EnvRtype R package, a novel  
20 toolkit developed to interplay large-scale envirotyping data (enviromics) into quantitative  
21 genomics. To start an user-friendly envirotyping pipeline, this package offers: (1) remote sensing  
22 tools for collecting (get\_weather and Extract\_GIS functions) and processing ecophysiological  
23 variables (processWTH function) from raw-environmental data at single locations or worldwide  
24 level; (2) environmental characterization by typing environments and profiling descriptors of  
25 environmental quality (EnvTyping function), but also for gathering environmental covariables as  
26 quantitative descriptors for predictive purposes (W.matrix function); (3) identification of  
27 environmental similarity that can be used as an enviromic-based kernel (EnvKernel function) in  
28 whole-genome prediction (GP), aiming to increase ecophysiology knowledge in genomic-best  
29 unbiased predictions (GBLUP) and emulate reaction-norm effects (get\_kernel function). We  
30 highlight literature mining concepts in fine-tuning envirotyping parameters for each plant  
31 species and target growing environment. We show that envirotyping for predictive breeding is  
32 not only collect raw data, but process it into a ecophysiology-smart way. Examples of use for  
33 creating global-scale envirotyping networks and the integration of reaction-norm modeling in GP  
34 is also outlined. We conclude that EnvRtype provides a cost-effective envirotyping pipeline  
35 capable to provide good-quality enviromic data for a diverse set of genomic-based studies,  
36 especially for increasing accuracy in GP across multiple environments.

## 37 INTRODUCTION

38 Quantitative Genetics theory divides the phenotypic variation (P) into a genetic (G) and  
39 non-genetic source of variation (E). This last may involve micro-environmental effects that can be  
40 controlled by good experimental designs and phenotype correction strategies (e.g., Resende and  
41 Duarte, 2007; Galli et al., 2018). Conversely, most of the non-genetic sources are due to macro-  
42 environmental fluctuations as a consequence of resource availability during crop lifetime  
43 (Shelford, 1931). Despite this unfolded division, the effect of the environment in shaping gene-  
44 expression (e.g., Plessis et al., 2015; Jończyk et al., 2017; Liu et al., 2020) and fine-tuning  
45 epigenetic factors (Varotto et al., 2020; Vendramin et al., 2020) creates an indissoluble  
46 envirotypes-phenotype covariance in the phenotypic records (Lynch and Walsh, 1998). Thus, for  
47 any genotype-phenotype association study across multiple environments (e.g., mapping  
48 quantitative trait loci, QTL; genomic association studies, GWAS) there is a strong non-genetic  
49 influence that can be better understood due to the use of envirotyping-based data, i.e., core of  
50 techniques to collect, process, typing, and integrate the environmental information in genetic-  
51 informed studies (Costa-Neto et al., 2020a).

52 Over the last ten years, envirotyping has been incorporated in whole-genome prediction  
53 (GP) aiming to better model genotype  $\times$  environment interaction (G $\times$ E) as a function of reaction-  
54 norm from environmental covariables (ECs), i.e., linearized responsiveness of a certain genotype  
55 for a target environmental gradient. Those genomic-related reaction-norms can be modeled as  
56 genotype-specific coefficients for each ECs due to whole-genome factorial regressions (Heslot et  
57 al., 2014; Ly et al., 2018; Millet et al., 2019), but also using those ECs to create envirotyping-based  
58 kinships (Jarquín et al., 2014; Morais-Junior et al., 2018; Costa-Neto et al., 2020a). This last has  
59 the advantage to be faster in approaching putative environmental similarities that may drive a  
60 large amount of phenotypic variation, while the first has the advantage of allowing a deeper

61 understanding of what ECs may better explain the phenotypic plasticity of organisms. The  
62 integration of ecophysiological enriched envirotyping data has led to outstanding results in  
63 model crops such as maize, due to the use of Crop Growth Models (Cooper et al., 2016; Messina et  
64 al., 2018) and Deep Kernel approaches (Costa-Neto et al., 2020a). Combined with phenotyping  
65 and genotyping data, the use of envirotyping data may leverage the molecular breeding strategies  
66 to understand historical trends and cope with future environmental change scenarios (Gillberg et  
67 al., 2019; de los Campos et al., 2020).

68 Despite the advance in the development of theories supporting the inclusion of  
69 envirotyping data in GP, there is difficult for most breeders to deal with the interplay between  
70 envirotyping, ecophysiology, and genetics. For example, to use molecular data as a sign of the  
71 allelic diversity of target germplasm or population, and then use it to build a genomic-  
72 relationship matrix (GRM), many researches have been made to explored to associate the raw-  
73 data into concepts and theories underlying quantitative genetics (e.g, Fisher's Infinitesimal  
74 Model). Genotyping pipelines based on bioinformatics were successfully developed to translate  
75 biochemical outputs collected from plant tissues onto biological significant markers of DNA  
76 polymorphisms, e.g., genotyping-by-sequence (GBS, Elshire et al.,2011). To the best of our  
77 knowledge, there is no publicly available user-friendly software to implement envirotyping  
78 pipelines to translate raw-environmental data into a useful matrix of envirotype descriptors. As  
79 consequence, is lacking a workflow to interplay enviromics (pool of environmental types,  
80 abbreviated as envirotypes) and genomics analysis, especially for conditions of GP for multi-  
81 environment testing (MET) where  $G \times E$  is the main concern hampering the model's accuracy.

82 In this study, we introduce EnvRtype, a novel R package to integrate macro-environmental  
83 factors in many fields of plant, animal or ecology science. We approached basic eco-physiological  
84 concepts underlying the collection and processing of raw-environmental data into a biological

85 and statistical manner. Then, we present the functions for implementing remote data collection  
86 and basic processing, and also its applications in deriving quantitative and qualitative descriptors  
87 of relatedness. Finally, we present a comprehensive view of how envirome-based data can be  
88 incorporated in GP for predictive purposes across diverse environments. We highlight the use of  
89 different envirotyping levels to discover descriptors of environmental similarity, using crop  
90 species to exemplify the concepts.

## 91 **METHODS**

### 92 **Envirotyping Pipeline**

93 EnvRtype is a R package created for handling envirotyping by ecophysiology concepts in  
94 quantitative genetics and genomics for multiple environments. This means that the envirotyping  
95 is not only a collection of raw environmental data and their use for exploratory or predictive  
96 process, but a pipeline based from the collection of raw-data to the processing of this data in an  
97 ecophysiology-manner that make sense for describing the development of the organism in target  
98 environment. Here we consider *enviromic* as the large-scale envirotyping of a theoretical  
99 population of environments for a target specie or germplasm (the so-called envirome). It also  
100 may denote the core of possible growing conditions and technological inputs to create different  
101 productivity levels.

102 The envirotyping pipeline implemented by EnvRtype software are divided in three  
103 modules, in which will brief described above and detailed in the next sections (Fig1).

104 Module 1 (yellow toolboxes in Fig 1) starts for collecting raw-environmental data. Data  
105 collection may involve existing experimental trials (single trials sampling) or historical trends for  
106 a given location × planting date arrangement. This module gathers the functions for remote data

107 collection of daily weather and elevation data, and the computation of ecophysiological variables,  
108 such as the effect of air temperature on radiation use efficiency. Thus, englobes a toolbox with  
109 “Remote Data Collection” and “Data Processing” steps, both designed to assist researchers with  
110 lower budgets to fund in-field environmental sensing equipment. More detail about the  
111 theoretical basis of environmental sensing and the module itself is given in the section named  
112 “Module 1: Remote Environmental Sensing”.

113         The processed environmental information now can be used for many purposes. At Module  
114 2, we designed tools for environmental profiling (characterization of environmental variations).  
115 It also can be done across different time intervals of crop growth and development (when  
116 associated with some crop) or fixed time intervals (to characterize locations). The toolbox of  
117 environmental characterization (green toolbox in Fig 1) involves two types of profiling:

118             (1) discovering environmental types (envirotypes, hereafter abbreviated as ETs) and their  
119 frequency of occurrence at each growing environment (location, planting date, year). From the  
120 ET-discovering step, it is possible to create environmental profiles and group environments with  
121 the same ET pattern. It is also useful for running exploratory analysis, such as to discover the  
122 main ET of planting dates at a target location.

123             (2) gathering environmental covariables (hereafter abbreviated as ECs) from point-  
124 estimates (e.g., mean air temperature, cumulative rainfall). These ECs can be used for many  
125 purposes, since basic interpretation of G×E to estimate gene-environment interactions. At the  
126 end of this process, a matrix of ECs (**W**) is created and integrated with tools from Module 3. More  
127 detail about this module are given in the section “Module 2: Macro-Environmental  
128 Characterization”.

129         Finally, the information from Module 2 can be used to create environmental similarity and  
130 integrate robust GP platforms for multiple environments, i.e., the hereafter referred as

131 envirotype-informed GP The Module 3 (wine colors in Figure 1) aims to provide tools to compute  
132 environmental similarity using correlations or Euclidean distances across different trials realized  
133 from ECs. Thus, we develop a function to integrate this enviromic sources in GP as an additional  
134 source of variation to bridge the gap between genomic and phenotypic variation. For that, we  
135 provide at least four different structures, into a flexible platform to integrate multiple genomic  
136 and enviromic kinships.

137 Figure 1 show some possible outputs of EnvRtype package (in red toolbox colors), in  
138 which **W** can be used to interpret G×E (e.g., factorial regression, see) or exploit it in terms of  
139 increasing the predictive ability of GP implemented in BGGE package. About this last, more detail  
140 is given in the section “Module 3: Environmental Similarity and Kernels for GP”. Below we gave  
141 some theoretical detail about each module and description of the functions used to implement it.

## 142 **Software**

143 The R package EnvRtype is available at <https://github.com/allogamous/EnvRtype>  
144 [verified 18 July, 2020]]. More detail about graphical plots and additional codes can also be found  
145 in this Git Hub webpage. Typing the following command in R will automatically install the  
146 package:

### BOX 1: Install EnvRtype

```
> install.packages('devtools')  
> devtools::install_github('allogamous/EnvRtype')  
> require('EnvRtype')
```

147

## 148 **MODULE 1: Remote Environmental Sensing**

149           What we call by “environment” is a unit delimited for a combination of location, planting  
150 date and management, which gathers the fluctuation for a core of environmental factors. Thus,  
151 the first step of any envirotyping study is the collection of reliable environmental data. However,  
152 for most breeding programs around the world, this step is limited by the availability of sensing  
153 equipment (e.g. weather-stations) installed in the field or in a near place. It is important to  
154 highlight that some equipment can be expensive or difficult to access for some research groups in  
155 certain regions, such as development countries. For this reason, below we present two  
156 justifications for incorporating a remote environmental sensing routine (in-silico) into this  
157 package. Then, we present recommendations to enrich the envirotyping platforms in order to  
158 collect and organize environmental data that will be useful in the decision-making of breeders.

159           Firstly, in order to facilitate the steps of collection of the environmental data, we decided  
160 to insert a routine for collecting basic daily weather data through the Nasa Power database,  
161 which can access information on a daily scale anywhere on the globe. This database was  
162 integrated using the tools provided by the nasapower R package (Sparks, 2018). In addition, we  
163 integrate the raster R package to support the download of climatic data (from the WorldClim  
164 database, Fick and Hijmans, 2017) and SRTM (Shuttle Radar Topography Mission, providing  
165 information about elevation). The information from both data bases are freely available and can  
166 be downloaded using geographical coordinates (Latitude and Longitude, given in decimal  
167 degrees, both in WGS84 format) for a specific time window (e.g., from sowing to harvest).

168           Secondly, the processing of the collected environmental data requires some expertise in  
169 fields such as agrometeorology, soil physics and ecophysiology. It is because to be really effective  
170 in explaining the crops adaptation, the environmental data must be representative of some



171 envirotype-to-phenotype dynamic linked to a certain ecophysiological knowledge (e.g., air  
172 temperature, relative air humidity and solar radiation driving the crops evapotranspiration and,  
173 consequently, the soil-water balance).

174 A direct example of the importance of processing raw-envirotyping data into  
175 ecophysiological enriched information is given for the variable “daily air temperature”. This  
176 variable can be processed in heat-units, heat-stress effect on radiation use efficiency and thermal  
177 range, which is specie-specific for different crops such as maize, soybean, pinewood etc. For some  
178 traits such as grain yield in maize, the impact of those temperature-derived factors differs from  
179 the impact observed for traits such as plant height or flowering time. This dynamic has also a  
180 variation across the crop development, which can be more or less suitable to become a stressful  
181 factor in certain phenological stages (e.g., heat in flowering time in maize has a higher impact on  
182 grain yield). Before this ecophysiological processing, some quality control of this data can also be  
183 done in order to remove possible outliers. Below is detailed some of those subroutines.

#### 184 **Remote data collection**

185 EnvRtype implements the remote collection of daily weather and elevation data by  
186 *get\_weather* function. This function has the following arguments: the environment name  
187 (**env.id**); geographic coordinates (latitude, **lat**; longitude, **lon**) in WGS84; time interval  
188 (**start.day** and **end.day**, given in “year-month-day”); and country identification (**country**),  
189 which sets the raster file of elevation for the region of a specific country. Countries are specified  
190 by their 3 letter ISO codes (check in <https://github.com/allogamous/EnvRtype> or use the  
191 function `getData(“ISO3”)` from raster package to see these codes).

192 Table 1 shows the names of the outputs of *get\_weather* and the *processWTH* (see Tools for  
193 basic Processing). All weather information is given in daily scale. Altitude (*ALT*) information is

194 given from SRTM 90 m resolution and can be collected from any place between -60 and 60  
195 latitude. This information are presented as a *data.frame* class output in R. For a same country, it  
196 is possible to create vectors of information to import the data for several environments at the  
197 same time.

198 A practical example of `get_weather` is given below. A collection of environmental data for  
199 Nairobi, Kenya (latitude 1.367 N, longitude 36.834 E) from 01 march 2015 to 01 April 2015, is  
200 performed by:

#### BOX 2: Practical use of `get_weather`

```
> env.data <- get_weather(env.id = 'NAIROBI',lat = -1.367,lon = 36.834,start.day = '2015-03-  
01',end.day = '2015-04-01',country = 'KEN')
```

201

202 . More examples are given in Results section.

203 A second function is *Extract\_GIS*, that can be used to collect point-values from large raster  
204 files from GIS databases. This function has 6 the arguments. The argument **env.data** indicates  
205 the name of the environmental data set (arranged as a *data.frame*). It can be an output *data.frame*  
206 of the *get\_weather* function or any spreadsheet of environmental data, as long as it is organized  
207 with a column denoting the name of the environment, which is defined by the **env.id** argument  
208 (default is `env.id = 'env'`). **Latitude** and **Longitude** can be given in decimal format as  
209 WGS84, the same manner described in *get\_weather*. Finally, the **name.out** is the argument to  
210 define the name of the collected covariable (e.g., ALT for altitude). The function *Extract\_GIS* can  
211 be useful for collecting covariables from raster files within data bases such as WorldClim  
212 (<https://www.worldclim.org/>), SoilGrids (<https://soilgrids.org/>) and EarthMaps  
213 (<https://earthmap.org/>).

214 A practical use of *Extract\_GIS* is given below. A collection of clay content (g/kg) for Nairobi  
215 using a raster file downloaded from SoilGrids and the function *Extract\_GIS*. The file  
216 'clay\_5\_15cm.tiff' is available in the Supplementary Data.

217

218

### BOX 3: Practical use of *Extract\_GIS*

```
> clay_5_15cm = raster('clay_5_15cm.tiff') # from raster package  
> Extract_GIS(covraster = clay_5_15cm, name.out = 'clay_5_15cm', env.data = env.data)
```

219

### 220 Summarizing raw-data

221 Basic data summary of the outputs from *get\_weather* function done by *summaryWTH*  
222 function. This function has 10 arguments (**env.data**, **id.names**, **env.id**, **days.id**,  
223 **var.id**, **statistic**, **probs**, **by.interval**, **time.window**, **names.window**). The common  
224 arguments with *Extract\_GIS* have also the same utility already described. Other identification  
225 columns (year, location, management, responsible researcher etc) may be indicated in **id.names**  
226 argument, e.g., `id.names = c('year','location','treatment')`.

227 Considering a specific environmental variable, the argument **var.id** can be used as, for  
228 example, `var.id = 'T2M'`. By default, this function considers all names of variables presented in  
229 Table 1. For other data sources, such as micro-stations outputs, this argument is indispensable to  
230 identify which variables will be summarized. The argument **days.id** indicates which day of the  
231 year (or days from the beginning of record), and the default is *daysFromStart* column from  
232 *get\_weather* function. A basic example of this use is given below.

### BOX 4: Practical use of *SummaryWTH*

```
> summaryWTH(env.data = env.data, env.id = 'env', days.id = 'daysFromStart', statistic =
```

```
'mean')  
> summaryWTH(env.data = env.data) # by default
```

233

234 Dividing the development cycle into time intervals (e.g., phenology), whether phenological  
235 or fixed time intervals (e.g. 10-day intervals) helps to understand the temporal variation of  
236 environmental factors during the crop growth cycle. Thus, specific time intervals can be done by  
237 the **time.window** argument (in days after the beginning of the data). For example, **time.window**  
238 = **c(0,14,35,60,90,120)** denote the intervals of 0-14 days from the first day of record (0). If  
239 the first record denotes the emergence date of the crop in the field, this can also be associated a  
240 some phenological interval. Those intervals can be named using the argument **names.window**,  
241 **names.window = c("P-E", "E-V1", "V1-V4", "V4-VT", "VT-GF", "GF-PM")**.

242 The argument **statistic** denotes which statistic will be used to summarize the data.  
243 The statistic can be: *mean*, *sum* or *quantile*. By default, all statistics are used. If **statistic =**  
244 **"quantile"**, the argument **prob** is useful to indicate which percentiles (from 0 to 1) will be  
245 collected from the data distribution, i.e., default is **prob = c(0.25, 0.50, 0.75)**, denoting the  
246 quantiles: first (25%) second (50%, median) and third (75%).

247

## 248 **Tools for basic data processing**

249 Basic data processing is done by *processWTH* function. As described for *summaryWTH*,  
250 this function also can be used to process environmental data for *get\_weather* outputs and other  
251 sources (micro-stations, in-field sensors) using the same arguments of identification (**env.data**,  
252 **id.names**, **env.id**, **days.id**, **var.id**). This function also gathers three other sub-functions  
253 created to compute general variables related to ecophysiological process, such as macro effects of  
254 the soil-plant-atmosphere dynamics and the impact of the atmospheric temperature on crop

255 development. Below we describe these three functions and the ecophysiological temperature  
256 concepts underlying their application.

## 257 **Radiation-related covariables**

258         The radiation balance in crop systems is regulated by the difference between the amount  
259 of incident radiation, absorbed energy by the plants and soil surface, and the converted thermal  
260 energy. From Nasa Power, the radiation outputs are given in terms of Top-of-atmosphere  
261 Insolation (ALLSKY\_TOA\_SW\_DWN), Insolation Incident on a Horizontal Surface (Shortwave,  
262 ALLSKY\_SFC\_SW\_DWN), and Downward Thermal Infrared Radiative Flux (Longwave,  
263 ALLSKY\_SFC\_LW\_DW). Thus, the net solar radiation available for the physiological process of  
264 growth (biomass production) is given by the difference between longwave and shortwave, i.e.,  
265  $SRAD = ALLSKY_SFC_LW_DW - ALLSKY_SFC_SW_DWN$ , in  $\text{MJ m}^{-2} \text{d}^{-1}$ .

266         Most of the growth modeling approaches, the effect of radiation use efficiency (RUE) is the  
267 main target to describe the relations between the available energy in the environment and how  
268 the plants translate it in biomass (see subsection Processing Thermal Parameters). In this  
269 context, this source of environmental variation is important to understand the differences in  
270 potential yield observed for genotypes evaluated across diverse environments. Radiation is also  
271 important as a source to regulate the available energy for other biophysical process, such as  
272 evaporation, transpiration and temperature (see subsection Processing Atmospheric  
273 Parameters).

274         EnvRtype made available a function named *Param\_Radiation* to compute additional  
275 radiation-based variables that can be useful for plant breeder and researchers from several fields  
276 of agricultural research (e.g., agrometeorology). These parameters include the actual duration of  
277 sunshine hours ( $n$ , in hours) and total daylength ( $N$ , in hours), both estimated according to the

278 altitude and latitude of the site, time of the year (julian day, from 1 to 365) and cloudiness (for  $n$ ).  
279 In additional, the lobal solar radiation incidence (SRAD, in  $\text{MJ m}^2 \text{d}^{-1}$ ) is computed as described in  
280 the beginning of this section. This last is important in most computations of crop  
281 evapotranspiration (Allen et al., 1998) and biomass production (Muchow et al., 1991). More  
282 detail about those equations are given in ecophysiology and evapotranspiration literature (Allen  
283 et al., 1998; Soltani and Sinclair, 2012).

284 The arguments of *Param\_Radiation* are: **env.data** and **merge**, in which merge denotes if  
285 the computed radiation parameters must be merged with the env.data set (merge = TRUE, by  
286 default).

### 287 **Temperature-related covariables**

288 Thermal variables are important for regulating the rates of important biochemical  
289 processes within the organisms. At cell level, the effect of temperature may regulate the rate of  
290 enzymatic reactions, in which critical values may led to denaturation of those enzymes and the  
291 death of the cell. At plant level, temperature related variables regulate the balance between  
292 photosynthesis (gross and net) and respiration in the canopy, impacting on radiation use  
293 efficiency (RUE). It also is related to the transpiration rates and consequently in the absorption of  
294 nutrients from water flux in in the roots. At reproductive stages, temperature affects the  
295 efficiency of pollination, which is directly related to the final yield of the crop, especially for  
296 species in which grain yield is the main target trait. Phenology development rates is also strongly  
297 influenced by temperature (e.g., growing degree-day, *GDD*), in which the balance between  
298 biomass accumulation and acceleration of the crop cycle may compromise the source:sink  
299 relations and then the final yield.

300 Table 2 summarizes the cardinal limits of temperature for several species. Those cardinal  
301 limits are used to compute growing degree-days (*GDD*) and the factor of temperature on  
302 radiation use efficiency (*FRUE*). The first is useful to predict the phenology development, while  
303 the second is an ecophysiology parameter to quantify the impact of temperature on crop growth  
304 and biomass accumulation in crop models (Soltani and Sinclair, 2012). Thus, both can be useful to  
305 relate how the temperature variations shapes the adaptation of some specie at the considered  
306 environment. *GDD* is also important for modeling plant-pathogen interactions, because some  
307 pests and diseases have their temperature-regulated growing.

308 In this context, dew point (*T2MDEW*) is another agrometeorology with great importance  
309 for crop sanity. In addition to being related to evaporation process in the stomata, this factor  
310 shapes the establishment of diseases (especially fungus) under the leaf pages. Finally, the daily  
311 temperature range (*T2M\_RANGE*) is a factor impacting process such as floral abortion for crops  
312 were the main trait are related to grain productions. For more detail about the impact of  
313 temperature in diverse agricultural crops, please check Luo (2011).

314 The function *Param\_Temperature* computes additional thermal-related parameters, such  
315 as *GDD* and *FRUE* and *T2M\_RANGE*. This function has 8 arguments (**env.data**, **Tmax**, **Tmin**,  
316 **Tbase1**, **Tbase2**, **Topt1**, **Topt2** and **merge**). For running this function with other data  
317 sources than *get\_weather*, is indispensable to indicate which columns denote maximum air  
318 temperature (**Tmax**, default is **Tmax = 'T2M\_MAX'**) and minimum air temperature (**Tmin**,  
319 default is **Tmin = 'T2M\_MIN'**). The cardinal temperatures must follow the ecophysiology  
320 literature previously described. Consider the dry bean crop at the same location in Nairobi,  
321 Kenya (previous box examples). The cardinals for dry bean were collected from Table 2.

BOX 5: Practical use of *Param\_Temperature* for Dry Bean Crop in Nairobi, Kenya

```
> Param_Temperature(env.data = env.data, Tbase1 = 8, Tbase2 = 45, Topt1 = 30, Topt2 = 35)
```

322

### 323 **Atmospheric demands**

324       The dynamic of water precipitation (rainfall) and water demand (evaporation+plants  
325 transpiration) is regulated as a consequence of the balance of radiation and thermal-related  
326 process in the atmosphere (Soltani and Sinclair, 2012; Allen et al., 1998). The soil-plant-  
327 atmosphere continuum involves the water dynamics from the soil, passing by plant tissues and  
328 going back do the atmosphere by the stomata. The rate of this process is deeply related to the  
329 biomass production of plants, but also in the absorption of nutrients by mass-flux in roots.  
330 Because of that, the water demands are essential to measure the quality of some growing  
331 environment.

332       We created the function *Param\_Atmosphere* to run basic computation of atmospheric  
333 demands. This function has 11 arguments: **env.data**, **PREC** (rainfall precipitation in mm, default  
334 is **PREC='PRECTOT'**), **Tdew** (dew point temperature in °C, default is **Tdew='T2M\_DEW'**), **Tmax**  
335 (maximum air temperature °C, default is **Tmax='T2M\_MAX'**), **Tmin** (minimum air temperature °C,  
336 default is **Tmin='T2M\_MIN'**), **RH** (relative air humidity %, default is **RH='RH2M'**), **Rad** (net  
337 radiation,  $R_n$ , in  $\text{MJ m}^{-2} \text{day}^{-1}$ , default is **Rad = 'Srad'**), **alpha**, (empirical constant accounting for  
338 vapour deficit and canopy resistance values, default is **alpha=1.26**), **Alt** (altitude, in meters  
339 above sea level, default is **Alt = ALT**), **G**, (soil heat flux in  $\text{W m}^{-2}$ , default is **G=0**) and **merge**  
340 (default is **merge=TRUE**). The usage of this function works in similar manner than the other two  
341 *Param* functions previously described.



342 From these inputs, we use the Priestley-Taylor equation to compute the reference crop  
343 evapotranspiration. At this equation, the empirical constant ( $\alpha = \alpha$ ) may range from 1 (at  
344 humidity conditions) to 2 (at arid conditions). First, we compute the vapour pressure,  
345 determined by:  $e_a = RH \times e_s$  (Dingman, 2002), where  $e_s$  is the saturation vapour pressure  
346 defined as (Buck, 1981):

$$e_s = [1.007 + (3.46 \times 10^{-5} \times P)] \times 6.1121 \times \exp\left(\frac{17.502 \times T_{avg}}{240.97 + T_{avg}}\right)$$

347 where  $T_{avg}$  is the average air temperature and  $P$  is the air pressure (kPa) computed from  
348 elevation as:  $P = 101.3 \times (293 - 0.0065 \times ALT/293)^{5.26}$ . Thus, from the daily vapour pressure  
349 ( $e_a$ ), we compute the slope of the saturation vapour pressure curve ( $\Delta$ ), by (Dingman, 2002):

$$\Delta = \frac{4098 \times e_s}{(T_{avg} + 237.2)^2}$$

350 Finally, the reference evapotranspiration ( $ET_0$ ) is computed as:

$$ET_0 = \alpha \frac{\Delta \times (R_n - G)}{\lambda_v \times (\Delta + \Upsilon)}$$

351 where  $\lambda_v$  is the volumetric latent heat of vaporization (2453 MJ m<sup>-3</sup>) and  $\Upsilon$  is the  
352 psychrometric constant (kPa C<sup>-1</sup>), that can be computed from air pressure as:  $\Upsilon = 0.665 \times 10^{-3}P$   
353 (Allen et al., 1998). For agricultural crops, we encourage the use crop coefficient ( $K_c$ ,  
354 dimensionless) to translate  $ET_0$  in crop-specific evapotranspiration. This  $K_c$  is computed from  
355 empirical phenotypic records (crop height, albedo of the soil-crop surface, canopy resistance)  
356 combined with in-field sensors (evaporation from soil), or using  $K_c$  estimates for each crop  
357 specie. Allen et al. (1998) provides a wide number of general  $K_c$  values to be used in this sense.  
358 For a complete understanding of soil-water dynamics, we suggest the use of pedotransfer

359 functions to derive some hydraulic properties of the soil, such as infiltration rate and water  
360 retention parameters. This can be done by soil samples or from remotely-collected data from  
361 SoilGrids using *Extract\_GIS*;

362 Below we present an example of usage for Nairobi, Kenya. Consider the same env.data  
363 collected in the previous box, and elevation value of Alt = 1,795:

364

#### BOX 6: Practical use of Param\_Atmospheric for Dry Bean Crop in Nairobi, Kenya

```
> Param_Atmospheric(env.data = env.data,Alt = 1795)
```

## 365 **MODULE 2: Macro-Environmental Characterization**

366 Environmental characterization is a fundamental step to understand how the  
367 environment regulates the gene-expression and phenotypic variation of the genotypes under  
368 diverse growing conditions (Xu 2016; Costa-Neto *et al.* 2020a)□. In this step, the collected raw  
369 environmental data is translated in useful information for both predictive or exploratory  
370 analysis, such as factorial regression focused on G×E analysis, or for environmental grouping. The  
371 typing of the environmental variations provides a better profiling visualization of which factors  
372 are impacting in differing ways from one environment than others. If there is no difference  
373 among environments, it is reasonable to assume that all phenotypic variations in field are due the  
374 genetic-related differences. Thus, envirotyping has the power to detect these differences and  
375 explore it to enhance genomic analysis, such as genomic prediction (GP) for multiple  
376 environments.

377 Here we develop tools to facilitate the envirotyping of biophysical factors in two ways, a  
378 qualitative standpoint (discovering envirotype descriptors) and quantitative (creating  
379 quantitative covariables). Bellow we highlight some concepts underlying the environmental  
380 characterization protocols. Next, we present the implementation of those concepts using the  
381 EnvRtype functions.

## 382 **Envirotype profiling with EnvTyping**

383 An environment can be viewed as the status of multiple resource inputs (e.g., water,  
384 radiation, nutrients) across a certain time interval (e.g., from sowing to harvesting) within a  
385 specific space or location. The quality of those environment is an end-result of the daily balance  
386 of resources availability, which can be described as a function of how much resources are  
387 available and the frequency of occurrence of those resources (e.g., transitory or constant effects).  
388 In addition, the relation of resource absorption and allocation depends on plant characteristics  
389 (e.g., phenology, current sanity status). Then, this particular environmental-plant influence is  
390 named after envirotype to differ to the concept of raw-environmental data (data collected  
391 directly from sensors). It also can be referred as environmental type (ET). Finally, the typing for  
392 environments can be done by discovering ETs, and the similarity among environments is a  
393 consequence of the number of ETs shared between each pariwise environment.

394 Before the discover of ETs, a first step is the design by ecophysiology concepts (e.g., plant  
395 necessity for some resource) or summarizing the raw data from the core of environments in  
396 analysis. Then, for each ET is computed the frequency of occurrence, which represent the  
397 frequency of certain quantities of resources for plant development. The typing by frequency of  
398 occurrence provides a deeper understanding about the distribution of the events, such as rainfall  
399 distribution across different growing cycles and occurrence of heat-stress conditions for a target

400 location (Heinemann *et al.* 2015)□. Thus, groups of environments can be better identified by  
401 analyzing the core of the events occurring on a target location, year or planting date. This step  
402 can be done not only using grade-point averages (e.g., accumulated sums or means for specific  
403 periods) but in terms of their historical similarity. In this way, we can not only group  
404 environments in the same year, but through a historical series of years. Finally, this analysis  
405 deepens in resolution when the same environment is divided by time intervals, which can be  
406 fixed (e.g., 10-day interval) or specific phenological stages for a specific crop.

407 To implement envirotype profiling, we create the *EnvTyping* function. This function  
408 computes the frequency of occurrence of each envirotype across diverse environments. This  
409 function as 12 arguments in which the 9 of them (**env.data**, **id.names**, **env.id**, **days.id**  
410 **var.id**, **statistic**, **by.interval**, **time.window**, **names.window**) works in the same way  
411 already described in the previous functions. The novel argument **cardinals** are responsible to  
412 define the biological thresholds between envirotypes and adaptation zones. These cardinals must  
413 respect ecophysiological limits for each crop, germplasm or region. For that, we suggest reading  
414 the literature of ecophysiology and crop growth modeling, such as Soltani and Sinclar (2012). The  
415 argument **cardinals** can be fill as vector (for single-environmental factors) or as list of vectors  
416 for each environmental factor considered in the analysis. For example, considering the cardinals  
417 for air temperature in dry beans presented in Table 2, the cardinals are typed as for Nairobi,  
418 Kenya:

#### BOX 7: Basic use of *EnvTyping* for typing temperature in Nairobi, Kenya

```
> EnvTyping(env.data = env.data, var.id = 'T2M', cardinals = c(0,8,30,35,40))
```

419

420 If `cardinals = NULL`, by default is used the quantiles 10%, 25%, 50%, 75% and 90%.

421 The definition of which quantiles will be used is given as the same manner as `prob` (in

422 *summaryWTH*), but now using the argument **quantile**, e.g., `quantile = c(0.25,0.50,0.75)`.

423 For multiple environmental factors, a list of cardinals must be created. For example,

424 considering the variables rainfall precipitation (*PRECTOT*, mm.day<sup>-1</sup>) and dew point temperature

425 (*T2DEW*, °C.day<sup>-1</sup>). Suppose that due to the researcher's expertise, precipitation values less than

426 10 mm.day<sup>-1</sup> are insufficient to meet the demands of the crops. Values between 11 mm.day<sup>-1</sup> and

427 40 mm.day<sup>-1</sup> would be considered excellent water conditions, and values of 40 mm.day<sup>-1</sup> would

428 be considered excessive rainfall. In this scenario, such rainfalls could be associated negatively

429 with flooding of the soil, drainage of fertilizers, among other factors related to crops lodging or

430 diseases occurrence. Thus, for *PRECTOT*, the cardinals will be `cardinals = c(0,10,40,Inf)`.

431 For dew point, let's assume a data-driven typing (`cardinals = NULL`) using the quantiles

432 previously described. Taking the same example for Nairobi, Kenya:

#### BOX 8: Basic use of EnvTyping for more than one variable

```
> var = c('PRECTOT', 'T2DEW') # variables
> card = list(PRECTOT = c(0,10,40,Inf), T2DEW = NULL) # cardinals and data-driven limits
> EnvTyping(env.data = env.data, var.id = var, cardinals = card)
```

433

#### 434 **Environmental Covariables with W.matrix**

435 The quality of an environment is measured by amount of resources availability to attempt

436 the demands of the plants. Over an experimental network composed of multi-environment trials

437 (MET), the quality of an environment is relative to the global environmental gradient. Finlay and

438 Wilkinson (1963) proposed the use of phenotypic data as quality index over an implicit  
439 environmental gradient. However, this implicit environmental quality index was proposed as an  
440 alternative to the use of explicit environmental factors, given the difficulties in obtaining high  
441 quality envirotyping data. Here we make available the use of explicit environmental data  
442 arranged in a quantitative descriptor as a covariate matrix (**W**), following the terminology used  
443 by Costa-Neto et al. (2020a) and de los Campos et al. (2020). From these **W** matrix, several  
444 analyzes can be used, such as: (1) dissecting the G×E interaction; (2) model the genotype-specific  
445 sensibility for key environmental factors; (3) dissecting the environmental factors of the QTL×E  
446 interaction; (4) integrate environmental data to model the gene × environment reaction-norm;  
447 (5) basic summary of the environmental gradient in some experimental network; (6) to produce  
448 environmental relationship matrices for genomic prediction.

449 To implement these applications, first the processed environmental data must to be  
450 translated into quantitative descriptors, by summarizing cumulative means, sums or quantile,  
451 such as in *summaryWTH*. However, this data must be mean-centered and scaled to assume a  
452 normal distribution and avoid variations due differences in scale dimension. For creating  
453 environmental similarity kernels, Costa-Neto et al (2020a) suggested the use of quantile statistics  
454 to better describe the distribution of each variable across the experimental network. Thus, this  
455 allows a statistic approximation of the ecophysiology importance of the environmental variables  
456 during crop growth and development. In this context, we developed the function *W.matrix* to  
457 create a double entry table ( $q$  environments/sites/years ×  $k$  environmental factors). Conversely  
458 to *EnvTyping*, the *W.matrix* function was designed to sample quantitative values of each  
459 environmental factor across different environments.

460 The same arguments for the functions *summaryWTH* and *EnvTyping* are applicable  
461 (**env.data**, **id.names**, **env.id**, **days.id** **var.id**, **statistic**, **by.interval**,

462 **time.window, names.window**). However, in *W.matrix* the arguments **center** = TRUE (by  
463 default) and **scale** = TRUE (by default) denotes mean-centered ( $w - \bar{w}$ ) and scaled ( $(w - \bar{w})/\sigma$ ),  
464 in which  $w$  is the original variable,  $\bar{w}$  and  $\sigma$  are the mean and standard deviation of this  
465 covariable across the environments (BOX line 9). A quality control (**QC** = TRUE argument) is  
466 done by removing covariables with more than  $\pm 2\sigma_{TOL}$ , where  $\sigma_{TOL}$  is the tolerance limit for  
467 standard deviation, settled by default argument as *sd.tol* = 3.

468 To exemplify a basic use of *W.matrix*, let's consider the same use for Nairobi, Kenya,  
469 involving only weather variables of temperature and rainfall precipitation, and assuming a  
470 quality control of *sd.tol* = 4. The time intervals were settled for each 10-day (default), and statistic  
471 as 'mean' for each variable at each time interval.

#### BOX 9: Basic use of EnvTyping for more than one variable

```
> var = c('PRECTOT', 'T2DEW', 'T2M_MAX', 'T2M_MIN') # variables  
> W<-W.matrix(env.data=env.data, var.id=var, statistic='mean', by.interval=TRUE, sd.tol=4)
```

### 472 **MODULE 3: Enviromic Similarity and Kernels for Genomic Prediction (GP)**

473 Whole-genome prediction (GP) has revolutionized both plant and animal breeding  
474 pipelines around the world. This technology enables an indirect selection of untested genotypes  
475 using statistical and computational approaches to link the phenotypic records and high-dense  
476 markers from related genotypes tested in the field trials. Since the first work proposing this  
477 methodology (Meuwissen et al 2001), GP has evolved for multiple scenarios (multi-trait, multi-  
478 environment), data sources (e.g., Westhues et al., 2017; Costa-Neto et al., 2020a) and  
479 computational approaches (e.g., Morota and Gianola, 2014; Cuevas et al., 2019; Crossa et al.,  
480 2019; de los Campos et al., 2020). Most of those approaches relies on increase the accuracy of

481 modeling genotype-phenotype patterns and explore it as predictive breeding tool. Among the  
482 several enrichments in computational efficacy and breeding applications, the integration of  
483 genomic by environment interaction (G×E) has boosted the ability of the genomic-assisted  
484 selection for evaluating a wide number of genotypes under several growing conditions over  
485 multiple environmental trials (MET).

486 Heslot et al (2014) and Jarquín et al (2014) introduced the use of environmental  
487 covariables to model an environmental source of the phenotypic correlation across MET. These  
488 approaches aim to model the reaction-norm of genotypes across MET, i.e., how different  
489 genotypes react to the different environmental gradient variation. For most cases, the reaction-  
490 norm modeling serve as additional source of variation for complementing the genomic  
491 relatedness among individuals tested and untested under know environmental conditions. Thus,  
492 in addition to the genomic kernels, now the envirotype-informed kernels can be used to capture  
493 macro-environmental relatedness shaping the phenotypic variation of relatives, the so-called  
494 *enviromic kernel* (Costa-Neto et al., 2020).

495 In the third Module of EnvRtype package, we present the tools implement this type of  
496 modeling approach. Two main functions were designed for those purpose. First for the  
497 construction of the environmental relationship kernels, the *EnvKernel*. The second is *get\_kernel*,  
498 aiming to integrate these kernels into statistical models for the GP-based selections across MET.  
499 In the next subsections, we describe the kernel methods to model envirotype-relatedness. Then,  
500 we present the statistical models that can be built with these kernels.

### 501 **Enviromic Kernels with EnvKernel**

502 In this package we use two types of kernel methods to compute enviromic-based  
503 similarity. The first consists of the traditional method based on the linear variance-covariance



504 matrix (Jarquín et al., 2014). This kernel is similar to GBLUP for the purpose of markers and can  
505 be described mathematically as:

$$\mathbf{K}_E = \frac{\mathbf{W}\mathbf{W}'}{\text{trace}(\mathbf{W}\mathbf{W}')/\text{nr}ow(\mathbf{W})} \quad (1)$$

506 where  $\mathbf{K}_E$  is the enviromic-based kernel for similarity among environments and  $\mathbf{W}$  matrix of ECs.  
507 Note that we use  $\mathbf{W}$  matrix, but any other source of data from environments can be used here as  
508 EC (e.g., typologies, diseases evaluations, managements).

509 The second method is a nonlinear kernel modeled by Gaussian processes, commonly  
510 called the Gaussian Kernel or GK. The use of GK for modeling  $\mathbf{K}_E$  was proposed by Costa-Neto et  
511 al (2020) and is described in a similar way to the approach already used for modeling genomic  
512 effects:

$$\mathbf{K}_E = \exp(h\mathbf{D}_{ii'}^2/Q) \quad (2)$$

513 where  $h$  is the bandwidth factor (assume as  $h = 1$  by default) factor multiplied by the Euclidean  
514 Distance  $\mathbf{D}_{ii'}^2 = \sum_k (w_{ik} - w_{i'k})^2$  for each pairwise elements in the  $\mathbf{W} = \{w_i, w_{i'}\}$ . This means that  
515 the environmental similarity is a function of the distance between environments realized by ECs.  
516 The scalar variable  $Q$  denotes the quantile used to pondered the environmental distance  
517 (assumed as  $Q = 0.5$ , equal to the median value of  $\mathbf{D}_{ii'}^2$ . The  $h$  can be computed using a marginal  
518 function as described by Pérez-Elizalde et al. (2015).

519 Both methods are implemented by the EnvKernel function. This function has the following  
520 main arguments: **env.data**, **env.id**, **gaussian** and **h.gaussian**. The first two arguments work  
521 in the same manner previously described for other functions. The argument **gaussian** (default is  
522 **gaussian = FALSE**) denotes if the models (1) or (2) are used to compute  $\mathbf{K}_E$ . If **gaussian =**  
523 **TRUE**, so the gaussian kernel (equation 2) is used, and **h.gaussian** must be inserted to compute

524 kernel. In the argument  $\mathbf{Y}$  (default is  $\mathbf{Y} = \text{NULL}$ ) it is possible to insert a phenotypic record to be  
525 used in the marginal function to compute a data-driven  $h$  (Pérez-Elizalde et al., 2015).

526 *EnvKernel* function has two outputs, named *varCov* (for variable's covariance) and *envCov*  
527 (for environments covariance). The first is useful to deepen the understanding the relatedness  
528 and redundancy of the ECs. The second output is  $\mathbf{K}_E$ . This matrix is the enviromic similarity  
529 kernel that will be integrated in the GP models (see 'Statistical Models for Genomic Prediction").

530 A basic use of *EnvKernel* is presented below. Consider the  $\mathbf{W}$  matrix created in Box 7 for  
531 the same environment in Nairobi, Kenya. The  $\mathbf{K}_E$  value using linear-covariance and gaussian  
532 kernel is given as:

533

534

#### BOX 10: Basic use of *EnvKernel*

```
> EnvKernel(env.data = W, gaussian = FALSE)
> EnvKernel(env.data = W, gaussian = TRUE)
```

535

#### 536 **Genomic-enabled prediction models with envirotyping data**

537 After the construction of the relationship kernels for environmental relatedness, it is  
538 possible to fit a wide number of statistical models using some packages available in R CRAN.  
539 However, it is important to consider that statistical models containing more complex structures  
540 (e.g., more than one genomic effect plus  $G \times E$  and environmental information) are naturally  
541 models with a more expensive computational effort and time. Under Bayesian inference, which  
542 demands multiple iterative sampling processes (e.g., via Gibbs sampler) to estimate the variance

543 components, the computational effort may be more expensive. Among the R packages created to  
544 run Bayesian linear models for Genomic Prediction, three main packages may be highlighted:  
545 BGLR-Bayesian Generalized Linear Regression (Pérez and de los Campos, 2014), BMTME-  
546 Bayesian Multi-Trait Multi-Environment (Montesinos-López et al., 2016) and BGGE-Bayesian  
547 Genotype plus Genotype by Environment (Granato et al., 2018). However, BGGE employs an  
548 optimization process that can be up to 4 times faster than BGLR and allows the incorporation of  
549 more kernel structures in front to BMTME. For this reason, EnvRtype has a function named  
550 *get\_kernel* aimed to organize the genomic or envirotyping-based kernels in different statistical  
551 model structures to be run in BGGE package.

552 Below we describe a generic model structure that covers the diversity of possible  
553 combinations for modeling the phenotypic variation across MET. This model considers  $k$  genomic  
554 and  $l$  enviromic effects plus fixed-effects and a random residual variation:

$$\mathbf{y} = \mathbf{1}\boldsymbol{\mu} + \mathbf{X}_f\boldsymbol{\beta} + \sum_{s=1}^k \mathbf{g}_s + \sum_{r=1}^l \mathbf{w}_r + \boldsymbol{\varepsilon} \quad (3)$$

555 where  $\mathbf{y}$  is the vector combining the means of each genotype across each one of the  $q$   
556 environments in the experimental network, in which  $\mathbf{y} = [\mathbf{y}_1, \mathbf{y}_2, \dots, \mathbf{y}_q]^T$ . The scalar  $\mathbf{1}\boldsymbol{\mu}$  is the  
557 common intercept or the overall mean. The matrix  $\mathbf{X}_f$  represents the design matrix associated  
558 with the vector of fixed effects  $\boldsymbol{\beta}$ . In some cases, this vector is associated with the environmental  
559 effects (target as fixed-effect). Random vectors for genomic effects ( $\mathbf{g}_s$ ) and enviromic-based  
560 effects ( $\mathbf{w}_r$ ) are assumed to be independent of other random effects, such as residual variation  
561 ( $\boldsymbol{\varepsilon}$ ). This is a generalization for a reaction-norm model because in some scenarios the genomic  
562 effects may be divided as additive, dominance and other sources (epistasis) and the genomic by  
563 environment (G×E) multiplicative effect. In addition, the envirotyping-informed data can be  
564 divided in several environmental kernels and a subsequent genomic by envirotyping (G×W)

565 reaction-norm kernels. Based in the Equation 6, the theory underpinning the *get\_kernel* function  
566 is summarized in three types of modeling:

567 i. **Genotype-effect GP Models.** Involves the baseline models accounting only for genotype-  
568 based effects, mostly associated with pedigree-based or genomic realized kinships. Those  
569 models consider  $\sum_{s=1}^p \mathbf{g}_s \neq 0$  and  $\sum_{r=1}^q \mathbf{w}_r = 0$ , in which  $g_s$  may be related to main  
570 genotype-effect (G), in the case of the main genotype-effect model (MM); and G plus a  
571 genotype by environment deviation (G+G×E), in the case of the so-called MDs model. Note  
572 that multiple genotype-relatedness kernels may be incorporated, such as for additive (A)  
573 and dominance (D) deviations and other sources of information from “omics”. All genomic  
574 kernels must to have the  $p \times p$  dimension, in which  $p$  is the number of genotypes.

575 ii. **Enviromic-enriched GP Models.** From the MM and MDs models, we add the acronym “E”  
576 to denote “enviromic-enriched” for EMM and EMDs models. Those models consider  
577  $\sum_{s=1}^p \mathbf{g}_s \neq 0$  and  $\sum_{r=1}^q \mathbf{w}_r \neq 0$ , in which  $g_s$  are related to G (EMM) or G+G×E (EMDs) and  
578  $w_r$  are only the main envirotpe effect (W). In this type of model, the environmental  
579 effects can be modeled as fixed deviation (using  $\mathbf{X}_f \boldsymbol{\beta}$ ) plus a random envirotyping-based  
580 variation ( $\sum_{r=1}^q \mathbf{w}_r$ ).

581 iii. **Enviromic-based Reaction-Norm GP.** From the MM and MDs models, we add the  
582 acronym “RN” from “reaction-norm”, resulting in RNMM and RNMDs models, respectively.  
583 As described in (ii), the environmental effects can now be modeled as fixed deviation  
584 (using  $\mathbf{X}_f \boldsymbol{\beta}$ ) plus a random envirotyping-based variation ( $\sum_{r=1}^q \mathbf{w}_r$ ). However, those RN  
585 models consider  $\sum_{s=1}^p \mathbf{g}_s \neq 0$  and  $\sum_{r=1}^q \mathbf{w}_r \neq 0$ , in which  $g_s$  are related to G (RNMM) or  
586 G+G×E (RNMDs), and  $w_r$  are related to main envirotpe effect (W) plus a envirotpe ×  
587 genomic interaction (G×W). In this context, RNMM accounts for the variation due  
588 G+W+GW, whereas RNMDs considers G+GE+W+GW.

589

590           The *get\_kernel* function has four main arguments, which is a list of genomic relationship  
591 kernels (**K\_G**), a list of environmental relationship kernels (**K\_E**), and phenotypic MET data set  
592 (**Y**), organized as vector of environment identification, vector of genotype identification and  
593 vector of trait values. Finally, the argument **model** sets the statistical model used (“MM”, “MDs”,  
594 “EMM”, “EMDs”, “RNMM” and “RNMDs”). Each genomic kernel in **K\_G** must have the dimension of  
595  $p \times p$  genotypes. At the same manner, the **K\_E** might have the dimension of  $q \times q$  environments,  
596 but in some cases the environmental kernels can be built at phenotypic observation level. This  
597 means that for each genotype at each environment, there is a different ECs, according for  
598 particular phenology stages or envirotyping at plant level. Thus, using the additional argument  
599 **size\_E** = ‘full’ (default is ‘environment’), the **K\_E** may accomplish a kernel with  $n \times n$ , in which  $n$   
600 =  $pq$ . The basic usage of *get\_kernel* in given in Results section.

## 601 **RESULTS**

602           Three sections of results were implemented to give a comprehensive overview of the most  
603 important functions of EnvRtype. First, we illustrate the use of EnvRtype in starting an  
604 envirotyping pipeline over different locations in the world. Second, we used a toy data set to  
605 demonstrate the creation of different environmental similarities based on different  
606 environmental factors. This type of application can be useful for researchers interested in predict  
607 the particular genotypic responses shaped by genomic and enviromic-specific factors across  
608 existing experimental trials or for assembly virtual scenarios. Finally, we compare the kernel  
609 methods for modeling environmental similarity in GP. For these last sections, we expect to give  
610 some insights to facilitate the usage of enviromic data in boosting GP for multiple environments.

## 611 **Global-scale Envirotyping**

612 To illustrate the use of EnvRtype for a global-scale envirotyping study, we consider  
613 different time periods (and years) within the summer season of 9 locations around the world:  
614 Goiânia (Brazil, 16.67 S, 49.25 W, from 15th March 2020 to 04th April 2020), Texcoco (Mexico,  
615 19.25 N, 99.50 W, from 15 th May 2019 to 15th June 2019), Brisbane (Australia, 27.47 S, 153.02  
616 E, from 15 th September 2018 to 04th October 2018), Montpellier (France, 43.61 N, 3.81 E, from  
617 18th June 2017 to 18th July 2017), Los Baños (Philippines, 14.170 N, 121.431 E, from 18th May  
618 2017 to 18th June 2017), Porto-Novo (Benin, 6.294 N, 2.361 E, from 18th July 2016 to 18th  
619 August 2016), Cali (Colombia, 3.261 N, 76.312 W, from 18th November 2017 to 18th December  
620 2017), Palmas (Brazil, 10.168 S, 48.331 W, from 18th December 2017 to 18th January 2018) and  
621 Davis (United States, 38.321 N, 121.442 W, from 18th July 2018 to 18th August 2018).

622 In this example, we use the identification 'GOI', 'TEX', 'BRI', 'MON', 'LOS', 'PON', 'CAL', 'PAL'  
623 and 'DAV' for each location, respectively (Figure 2A).

### BOX 11: Remote Sensing for Serveral Places

```
> env = c('GOI', 'TEX', 'BRI', 'MON', 'LOS', 'PON', 'CAL', 'PAL', 'DAV')
> lat = c(-16.67, 19.25, -27.47, 43.61, 14.170, 6.294, 3.261, -10.168, 38.321)
> lon = c(-49.25, -99.50, 153.02, 3.87, 121.241, 2.361, -76.312, -48.331, -121.442)
> start = c('2020-03-15', '2019-05-15', '2018-09-15',
            '2017-06-18', '2017-05-18', '2016-07-18',
            '2017-11-18', '2017-12-18', '2018-07-18')
> end = c('2020-04-15', '2019-06-15', '2018-10-15',
          '2017-07-18', '2017-06-18', '2016-08-18',
          '2017-12-18', '2018-01-18', '2018-08-18')
> env.data<-get_weather(env.id = env, lat = lat, lon = lon, start.day = start, end.day = end)
```

624

625 From the collected variables, its possible to type any environmental factor or a core of  
626 environmental factors (Figure 2B). As a toy exemplification, we use the variable 'T2M' (daily  
627 average temperature at 2 meters) to discover environmental types (ETs) and compute  
628 environmental similarity (Figure 2C). In this case, we used the gaussian kernel as sign of  
629 environmental distance, but it also can be used as kinship for predictive breeding (Costa-Neto et  
630 al., 2020a).

#### BOX 12: Discovering ETs and similarity among locations

```
> ET = EnvTyping(env.data = env.data,env.id = 'env',var.id = "T2M")
> EC = W.matrix(env.data = env.data,var.id = 'T2M')
> distances = EnvKernel(env.data = ET,gaussian = T)[[2]] # fig a
> kinship = EnvKernel(env.data = EC,gaussian = F, sd.tol = 3)[[2]]
```

631

632 It's possible to see in this toy example, that perhaps locations in different continents might  
633 have similar ET trends for air temperature. This process can be done for several variables (single  
634 or joint) to better describe those similarity. The combination of the remote sensing + typing  
635 strategies is a powerful for turbocharging global patternships of field testing and germplasm  
636 exchange. It also contributes for increase the prediction of genotypes across a wide range of  
637 growing conditions, i.e., the so-called adaptation landscapes (Messina et al., 2018; Bustos-Korts et  
638 al., 2019). This can involve past trends and virtual scenarios (Gillberg et al., 2019; de los Campos  
639 et al., 2020). Associated with predictive GIS tools, the recommendation of cultivars might also be  
640 leveraged for specific regions (Costa-Neto et al., 2020b). It also can increase for a better

641 definition of field trials positioning (Tassinari et al., 2020) and how breeding strategies have  
642 impact on crops adaptation in the past (Heinemann et al., 2019);

### 643 **Panels of environmental similarity and reaction-norm**

644 To illustrate the use of different ECs in GP, we run a toy example involving a tropical maize  
645 set available in EnvRtype. This data set was included in Souza et al. (2017) and Cuevas et al  
646 (2019) and comes from the Helix Seeds Company (HEL). However, to facilitate the demonstration  
647 of functions, we made available a subset of 150 hybrids per environment, thus counting 750  
648 genotypes per environment observations. Grain yield data are mean-centered and scaled  
649 (*MaizeYield* object). Genotyping relationship for additive effects is based on 52,811 SNPs are also  
650 available to make the predictions (*maizeG* object). The phenotypic and genomic data of inbred  
651 lines are credited to Helix Seeds Ltda. Company. Finally, weather data are presented for each one  
652 of the 5 environments (*maizeWTH* object). This data sets becomes available in the R environment  
653 by running the following R-code:

#### BOX 13: Toy data sets for illustrate GP examples

```
> data("maizeYield") # phenotype data (grain yield per environment)
> data("maizeG")     # genomic relationship for additive effects
> data("maizeWTH")  # environmental data
```

654  
655 We run an example of GP considering reaction-norm and different levels of envirotyping  
656 per environment, which is: (1) envirotyping mean values per environment (entire croplife) and  
657 (2) envirotyping mean values for each time interval across crop life. We consider two types ECs:  
658 factor of temperature effect over radiation use efficiency (FRUE) and the difference between



659 rainfall precipitation and crop evapotranspiration (PETP). From equation (3), these ECs were  
660 arranged in four kernel structures using the RNMM model:

- 661 • Model 1: genomic plus an enviromic kernel build with a single EC (FRUE):

$$662 \quad \mathbf{y} = \mathbf{1}\boldsymbol{\mu} + \mathbf{g} + \mathbf{FRUE} + \mathbf{g} \times \mathbf{FRUE} + \boldsymbol{\varepsilon} \quad (4)$$

- 663 • Model 2: genomic plus an enviromic kernel build with a single EC (PETP):

$$664 \quad \circ \quad \mathbf{y} = \mathbf{1}\boldsymbol{\mu} + \mathbf{g} + \mathbf{PETP} + \mathbf{g} \times \mathbf{PETP} + \boldsymbol{\varepsilon} \quad (5)$$

- 665 • Model 3 [Joint EC model]: genomic plus an enviromic kernel build with FRUE and PETP  
666 ( $\mathbf{W}$ ). This is the benchmark reaction norm model (Jarquín et al., 2014), but here  
667 considering only two columns of covariates:

$$668 \quad \mathbf{y} = \mathbf{1}\boldsymbol{\mu} + \mathbf{g} + \mathbf{W} + \mathbf{g} \times \mathbf{W} + \boldsymbol{\varepsilon} \quad (6)$$

- 669 • Model 4 [Multiple EC model]: genomic plus two enviromic kernels, from FRUE and PETP,  
670 respectively. Differently from model (6), here the effects of each environmental gradient is  
671 modeled separately as:

$$672 \quad \mathbf{y} = \mathbf{1}\boldsymbol{\mu} + \mathbf{g} + \mathbf{FRUE} + \mathbf{PETP} + \mathbf{g} \times \mathbf{FRUE} + \mathbf{g} \times \mathbf{PETP} + \boldsymbol{\varepsilon} \quad (7)$$

673 These envirotyping levels and model structures can be implemented in EnvRtype as:

#### BOX 14: Envirotyping levels and model structures for GP with ECs

```
### 1- Environmental Covariables (ECs)
> wFRUE1 = W.matrix(env.data = maizeWTH, var.id = 'FRUE', statistic = 'mean')
> wPETP1 = W.matrix(env.data = maizeWTH, var.id = 'PETP', statistic = 'mean')
> wJoint1 = W.matrix(env.data = maizeWTH, var.id = c("FRUE", 'PETP'), statistic = 'mean')

### 2- Kernels
> K1 = EnvKernel(env.data = wFRUE1)[[2]]
> K2 = EnvKernel(env.data = wPETP1)[[2]]
> K3 = EnvKernel(env.data = wJoint1)[[2]]
> K4 = list(FRUE = K1, PETP = K2);
```

```
> K1 = list(FRUE=K1); K2 = list(PETP=K2); K3 = list(Joint = K3); KG = list(G=maizeG);  
### 3- Obtain Kernel Models  
> M1 = get_kernel(K_G = KG, K_E = K1; Y = maizeYield, model = "RNMM")  
> M2 = get_kernel(K_G = KG, K_E = K2, ,Y = maizeYield, model = "RNMM")  
> M3 = get_kernel(K_G = KG, K_E = K3, Y = maizeYield, model = "RNMM")  
> M4 = get_kernel(K_G = KG, K_E = K4, Y = maizeYield, model = "RNMM")  
### 4- Genomic Prediction  
> require(BGGE)  
> fit1 = BGGE(y = maizeYield$value, K = K1, ne = table(maizeYield$env))  
> fit2 = BGGE(y = maizeYield$value, K = K2, ne = table(maizeYield$env))  
> fit3 = BGGE(y = maizeYield$value, K = K3, ne = table(maizeYield$env))  
> fit4 = BGGE(y = maizeYield$value, K = K4, ne = table(maizeYield$env))
```

674

675 From a brief diagnosis of variance components and model fit (correlation between  
676 observed and predicted values without missing entries,  $r$ ), its possible to observe that for the  
677 same raw-environmental data, each envirotyping level and modeling structure impacts on  
678 modeling the phenotypic variation. When envirotyping are done by environment, there is a bad  
679 fitness (from 0.48 in Model 1 to 0.57 in Model 4) in relation to the models with envirotyping level  
680 by time interval (from 0.92 in Model 2 to 0.97 in Model 1). It also reflected how the different  
681 levels of envirotyping impact on the understanding of which ECs explain the phenotypic variation  
682 across field trials.

683 In addition, the envirotyping level per time-interval lead to an increase of genomic  
684 variance components and drastically reduction of residual variation. For Model 4 with the  
685 envirotyping level by time-interval, it was possible to observe that the PETP effect is a  
686 determinant of genomic  $\times$  enviromic interaction in this experimental network. In addition, those  
687 effect were better visualized in the model involving a second covariate (Model 4), because in this

688 sense it is expected to better capture the single effect of PETP free of the inner effect of other  
689 covariates. This ECs represents the atmospheric demand over the soil-plant-atmospheric  
690 continuum. Thus, for predictive purposes, we suggest to use also ECs from soil-water balance  
691 (e.g., soil water potential), in which can be collected from field-based sensors or estimated using  
692 crop growth modeling approaches.

693 From the toy results demonstrated in this section, it is feasible to conclude that for this  
694 trait (grain yield), at this germplasm and experimental network, the increased knowledge about  
695 temporal variation of ECs also increased the ecophysiology knowledge of GP in explaining  
696 phenotypic variation. As consequence, it can lead to accuracy gains in predicting novel genotypes  
697 and novel environments. Obviously, further studies are needed in this sense, but here we  
698 introduce this concept as a potential application of EnvRtype in increasing ecophysiology  
699 knowledge in GP.

## 700 **Benefits of Gaussian Kernel for GP with enviromic data**

701 Finally, to illustrate the differences in kernel methods in reproducing environmental  
702 similarity, we compare the last results from models 4-7 now using a gaussian kernel approach.  
703 For that, we use the same codes from the box 14, but now the argument gaussian is `gaussian =`  
704 `TRUE`.

705

### BOX 15: Use of Gaussian Kernel for modeling enviromic kinships

```
### 2- Kernels  
> K1 = EnvKernel(env.data = wFRUE1,gaussian=TRUE)[[2]]  
> K2 = EnvKernel(env.data = wPETP1,gaussian=TRUE)[[2]]
```

```
> K3 = EnvKernel(env.data = wJoint1, gaussian=TRUE)[[2]]  
> K4 = list(FRUE = K1, PEP = K2);  
> K1 = list(FRUE=K1); K2 = list(PEP=K2); K3 = list(Joint = K3); KG = list(G=maizeG);
```

706

707 As expected, it was observed differences in modeling structures (Figure) and ECs  
708 importance (Table 4). However, it was observed an increase in all models in relation to the  
709 benchmark linear covariance matrix (Table 3). The models with envirotyping level per  
710 environment were the most benefit from using gaussian kernel Model 1 using envirotyping level  
711 per environment were the most successful model in reducing residual variation and fitness ( $r =$   
712 0.99) when FRUE are modeled from gaussian kernel. However, the models with envirotyping  
713 level per time-interval still outperforms the envirotyping per environment in adjusting models  
714 with more suitable to explain the phenotypic variance from genomic kinships. This is a signal that  
715 models with those level of envirotyping data may also be useful to increase the accuracy of GP for  
716 multiple environments for conditions with low genomic-heritability. Finally, in comparison with  
717 the linear-covariance matrix, the nonlinear gaussian kernel were more efficient in capturing  
718 genomic  $\times$  enviromic interactions (comparison between Tables 3 and 4). In addition, the  
719 importance of FRUE and PEP were better elucidated using gaussian kernel, despite the internal  
720 differences between those two ECs are not changed from the observed using linear covariance  
721 matrix.

## 722 CONCLUSION

723 The collection, processing and use of envirotyping data in genomic-based studies depends  
724 not only of the quality of the data sources. Here we demonstrate that the increased ecophysiology  
725 knowledge in envirotyping is benefit not only to increase accuracy of statistical models in

726 genomic prediction, but also to provide a better explanation of the sources of variation and  
727 increase efficiency in those models. The correct use of envirotyping data depends on the quality  
728 of data processing and it is specific for each crop specie (or living organism). A same  
729 'environment' (considering a time interval for a target location) may result in different  
730 environmental types (ETs) for each organism, which depends on their sensibility in respond to  
731 constant and transitory variations of the environment. Thus, in this study we presented some of  
732 those concepts and created functions (and gather others from different R packages) to facilitate  
733 the use of envirotyping data in quantitative genomics. We also show that global envirotyping  
734 networks can be build using remote sensing tools and functions provided in EnvRtype. Other  
735 uses of the functions presented here may involve: (1) the creation of multiple environment  
736 scenarios for predictive breeding; (2) an enviromic scan of which ETs better explain  
737 environmental similarities. Then, this information can be used for design better experimental  
738 networks and accelerate the screening of genotypes for target environments in which perform  
739 better; (3) analysis of historical trends to quantify the impact of recent climate changings in long-  
740 term breeding strategies conducted in target regions; (4) integrate crop growth models, but as  
741 inputs in functions such as W.matrix and EnvTyping, but also to predict the crops performance  
742 across diverse water or nitrogen management levels, which also may involve the use of the  
743 collected data from `get_weather` and other sources.

744

## 745 REFERENCES

Costa-Neto, G. M. F., O. P. Morais Júnior, A. B. Heinemann, A. P. de Castro, and J. B. Duarte, 2020 A  
novel GIS-based tool to reveal spatial trends in reaction norm: upland rice case study.  
*Euphytica* 216: 1–16.

- Heinemann, A. B., C. Barrios-Perez, J. Ramirez-Villegas, D. Arango-Londoño, O. Bonilla-Findji *et al.*, 2015 Variation and impact of drought-stress patterns across upland rice target population of environments in Brazil. *J. Exp. Bot.* 126: 1–14.
- Sparks, A., 2018 nasapower: A NASA POWER Global Meteorology, Surface Solar Energy and Climatology Data Client for R. *J. Open Source Softw.* 3: 1035.
- Xu, Y., 2016 Envirotyping for deciphering environmental impacts on crop plants. *Theor. Appl. Genet.* 129: 653–673.

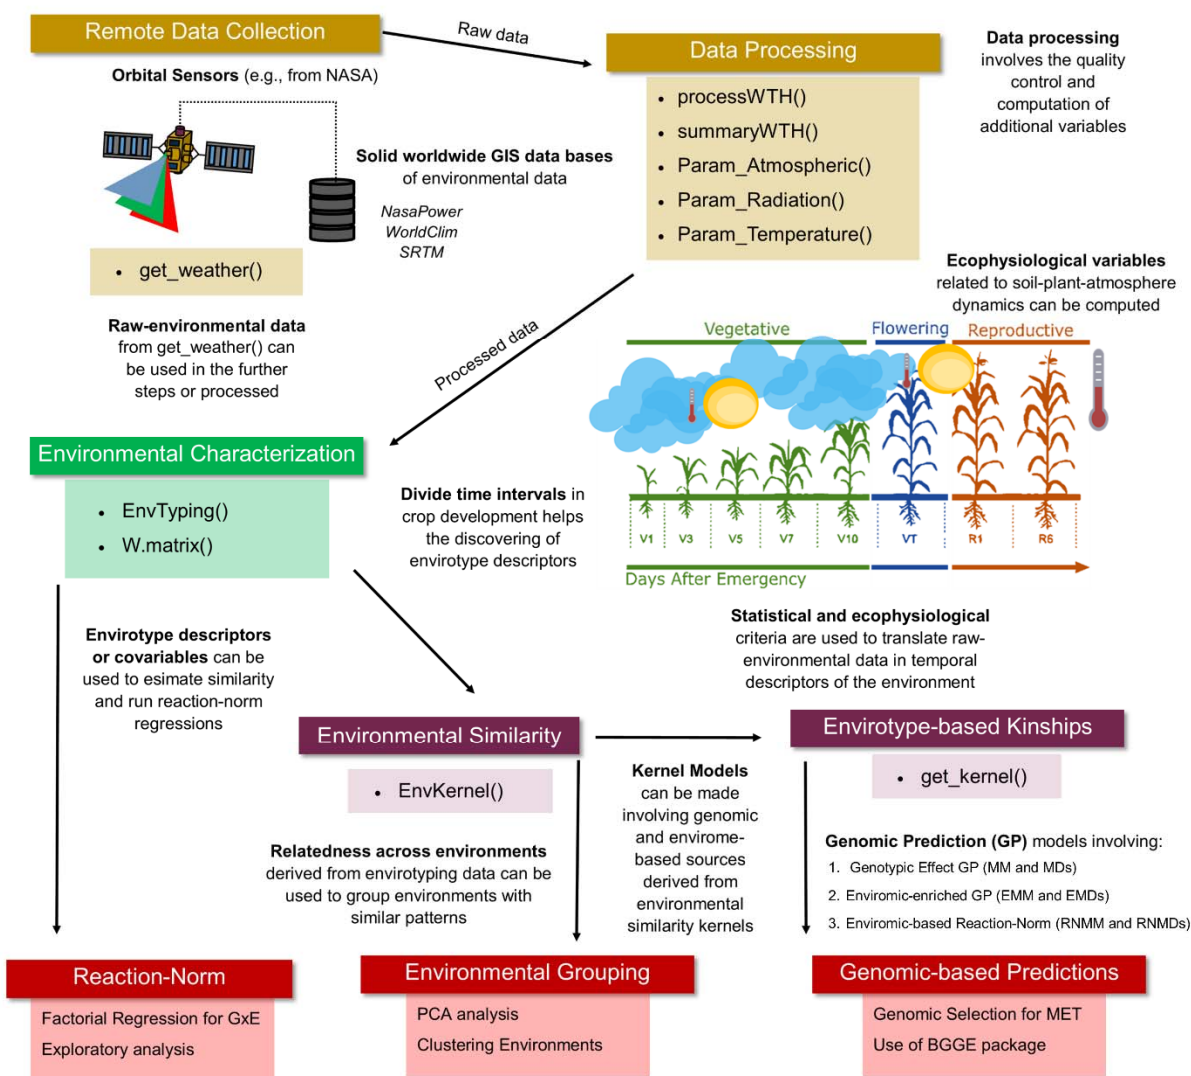

**Figure 1. Workflow of the envirotyping pipeline implemented using EnvRtype in R.** Yellow, Green, Wine and Red colors box denote the steps related to the Modules 1, 2, 3 and the outputs from EnvRtype. Black arrows indicate the flux direction of the envirotyping pipeline

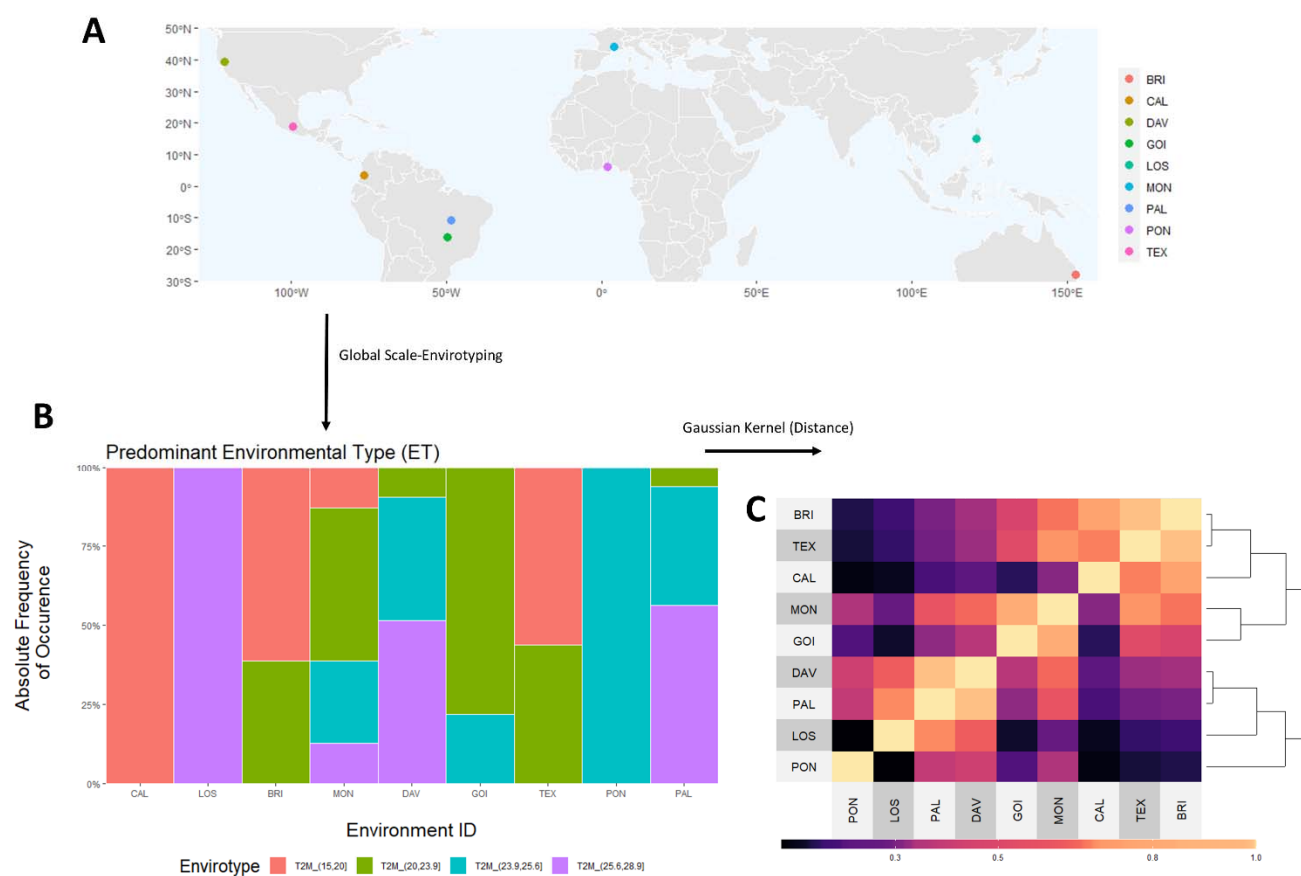

**Figure 2.** Global scale envirotyping highlight possible environmental similarity for locations in different continents. **A.** Worldspread geographic positions of 9 locations used as toy-example. **B.** Panel of environmental types (ET) for average air temperature during a certain month of a certain year in the summer season of each location. **C.** Environmental Similarity matrix based on the ETs and computed using Gaussian Kernel.



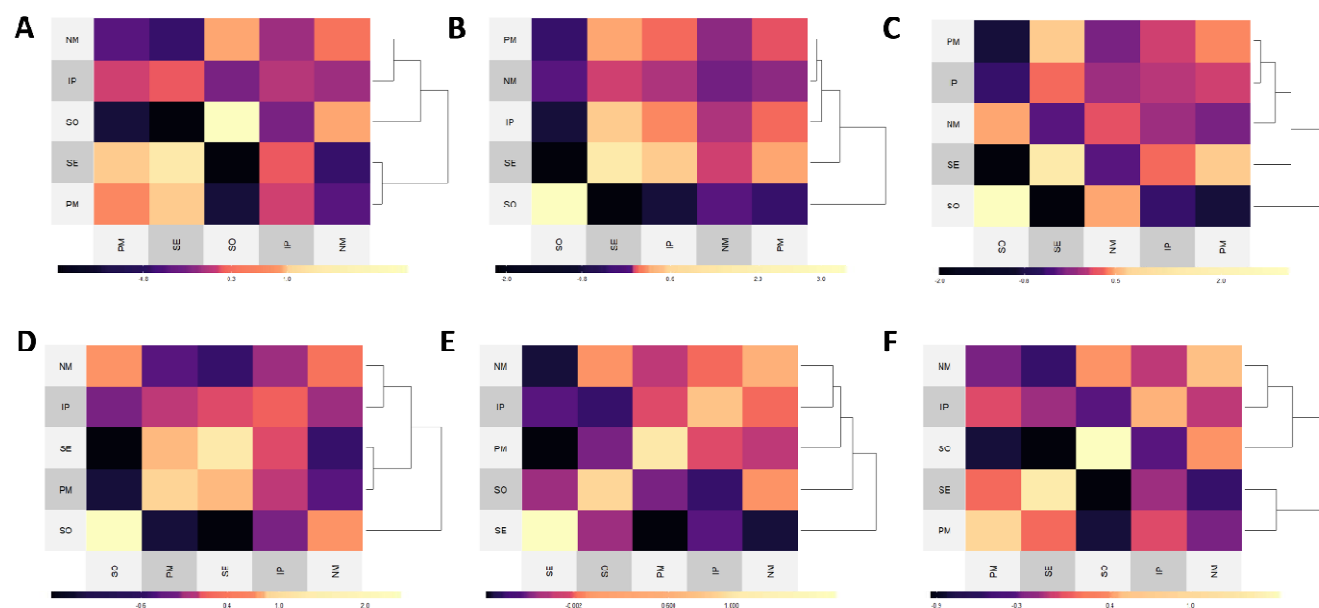

**Figure 3.** Linear enviromic kernels based the combination of two environmental covariates (ECs) and two envirotyping levels for 5 locations over an experimental network of tropical maize. Kernel were based on FRUE variable (impact of temperature on radiation use efficiency) for envirotyping at entire croplife (**A**) or divided by time intervals (**D**); **B.** PETP variable (deficit of evapotranspiration,  $\text{mm}\cdot\text{day}^{-1}$ ) for entire croplife (**B**) or divided by time intervals (**E**) and a combination of those two variables into a single kernel for entire croplife (**C**) or by time intervals of croplife (**F**).

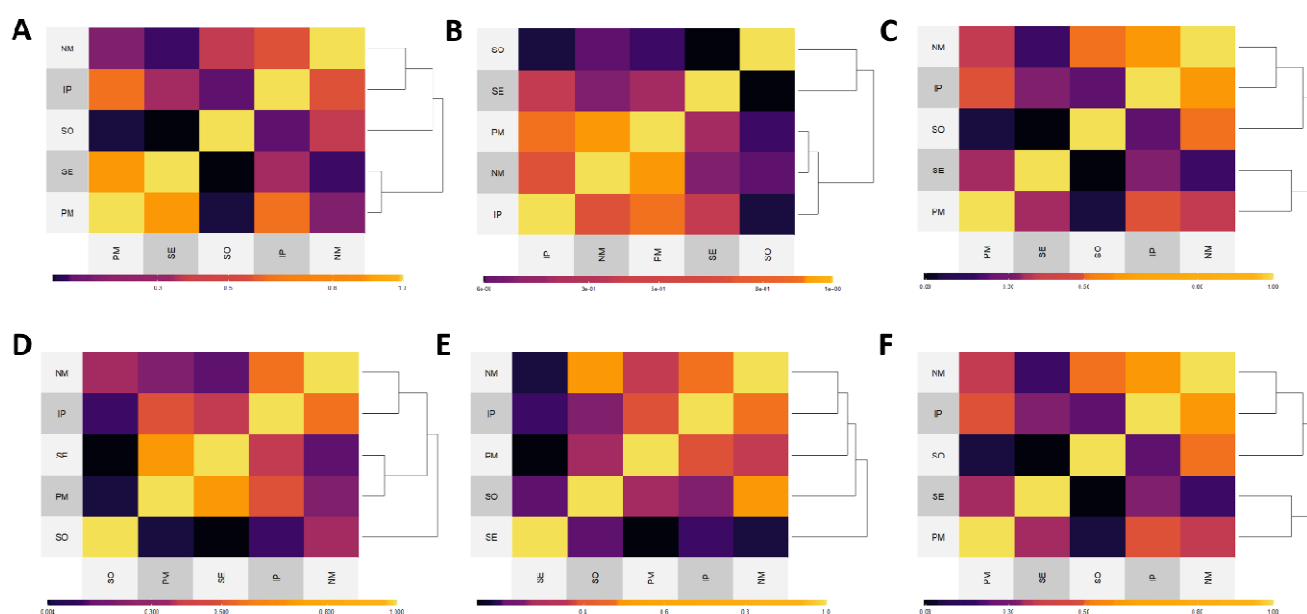

**Figure 4.** Nonlinear enviromic kernels (gaussian) based the combination of two environmental covariates (ECs) and two envirotyping levels for 5 locations over an experimental network of tropical maize. Kernel were based on FRUE variable (impact of temperature on radiation use efficiency) for envirotyping at entire croplife (**A**) or divided by time intervals (**D**); **B**. PETP variable (deficit of evapotranspiration,  $\text{mm}\cdot\text{day}^{-1}$ ) for entire croplife (**B**) or divided by time intervals (**E**) and a combination of those two variables into a single kernel for entire croplife (**C**) or by time intervals of croplife (**F**).

**Table 1.** Core of environmental factor available using the ‘Environmental Sensing Module’ of *EnvRtype* package.

| Source                  | Environmental Factor                                          | Unit                               |
|-------------------------|---------------------------------------------------------------|------------------------------------|
| Nasa Power <sup>1</sup> | Top-of-atmosphere insolation                                  | MJ m <sup>-2</sup> d <sup>-1</sup> |
|                         | Average insolation incident on a horizontal surface           | MJ m <sup>-2</sup> d <sup>-1</sup> |
|                         | Average downward longwave radiative flux                      | MJ m <sup>-2</sup> d <sup>-1</sup> |
|                         | Wind speed at 10 m above the surface of the earth             | m s <sup>-1</sup>                  |
|                         | Minimum air temperature at 2 m above the surface of the earth | °C d <sup>-1</sup>                 |
|                         | Maximum air temperature at 2 m above the surface of the earth | °C d <sup>-1</sup>                 |
|                         | Dew-point temperature at 2 m above the surface of the earth   | °C d <sup>-1</sup>                 |
|                         | Relative air humidity at 2 m above the surface of the earth   | %                                  |
|                         | Rainfall precipitation (P)                                    | mm d <sup>-1</sup>                 |
| SRTM <sup>2</sup>       | Elevation (above sea level)                                   | m                                  |
| Computed <sup>3</sup>   | Effect of Temperature on Radiation use Efficiency             | -                                  |
|                         | Evapotranspiration (ETP)                                      | mm d <sup>-1</sup>                 |
|                         | Atmospheric water deficit P-ETP                               | mm d <sup>-1</sup>                 |
|                         | Deficit of vapor Pressure                                     | kPa d <sup>-1</sup>                |
|                         | Slope of saturation vapor pressure curve                      | kPa C° d <sup>-1</sup>             |
|                         | Temperature Range                                             | °C d <sup>-1</sup>                 |
|                         | Global Solar Radiation based on Latitude and Julian Day       | MJ m <sup>-2</sup> d <sup>-1</sup> |

<sup>1</sup> collected from NASA orbital sensors (Stackhouse Jr., 2014); <sup>2</sup> Shuttle Radar Topography Mission integrated with the raster R package; <sup>3</sup> processed using concepts from Allen et al (1998) and Soltani and Sinclair (2012).

**Table 2.** Synthesis of some cardinal limits for the effect of temperature on the phenology development in the main agricultural crops. These estimates were adapted from Soltani and Sinclair (2012), Lago et al (2009), Steinmetz (2004), Buriol et al. (1991), Venkataraman et al. (2007)

| Specie                                   | Suggested Cardinal Limit |       |       |        |
|------------------------------------------|--------------------------|-------|-------|--------|
|                                          | Tbase1                   | Topt1 | Topt2 | Tbase2 |
| Maize                                    | 8.0                      | 30.0  | 37.0  | 45.0   |
| Wheat                                    | 0.0                      | 25.0  | 28.0  | 40.0   |
| Rainfed Rice                             | 8.0                      | 30.0  | 37.0  | 45.0   |
| Irrigated Rice (only vegetative stage)   | 8.0                      | 28.0  | 40.0  | 45.0   |
| Irrigated Rice (only reproductive stage) | 15.0                     | 25.0  | 35.0  | 45.0   |
| Sorghum                                  | 8.0                      | 30.0  | 37.0  | 45.0   |
| Soybean                                  | 8.0                      | 30.0  | 35.0  | 45.0   |
| Peanut                                   | 8.0                      | 30.0  | 35.0  | 45.0   |
| Canola                                   | 0.0                      | 25.0  | 28.0  | 40.0   |
| Sunflower                                | 8.0                      | 30.0  | 34.0  | 45.0   |
| Dry Bean                                 | 8.0                      | 30.0  | 35.0  | 45.0   |
| Chickpea                                 | 0.0                      | 25.0  | 30.0  | 40.0   |
| Barley                                   | 0.0                      | 25.0  | 28.0  | 40.0   |
| Sugarcane                                | 5.0                      | 22.5  | 35.0  | 40.0   |

**Table 3.** Summary of a variance components and correlation between observed and predicted values ( $r$ ) from a preliminary reaction-norm study involving two envirotyping levels (per environment, by.interval = FALSE; and per time intervals by environment, by.interval=TRUE), for a RNMM model involving additive genomic effects (G) and different structures for environmental covariates (ECs). The  $r$  values were computed using all phenotypic data. Enviromic kinships were build using a linear-covariance matrix (gaussian = FALSE).

| Effect per Model          | Envirotyping level |                             |
|---------------------------|--------------------|-----------------------------|
|                           | Environment        | Time Interval × Environment |
| <b>Model 1: FRUE</b>      |                    |                             |
| E = [FRUE]                | 2.025              | 15.841                      |
| Genomic (G)               | 0.428              | 0.482                       |
| GxE                       | 0.037              | 0.074                       |
| Residual                  | 0.855              | 0.152                       |
| Total                     | 3.345              | 16.548                      |
| r =                       | 0.48               | 0.97                        |
| <b>Model 2: PETP</b>      |                    |                             |
| E = [PETP]                | 3.058              | 4.093                       |
| Genomic (G)               | 0.454              | 0.481                       |
| GxE                       | 0.039              | 0.093                       |
| Residual                  | 0.826              | 0.221                       |
| Total                     | 4.378              | 4.888                       |
| r =                       | 0.52               | 0.92                        |
| <b>Model 3: Joint</b>     |                    |                             |
| E=[FRUE + PETP]           | 3.331              | 5.185                       |
| Genomic (G)               | 0.430              | 0.511                       |
| GxE                       | 0.046              | 0.093                       |
| Residual                  | 0.819              | 0.213                       |
| Total                     | 4.626              | 6.002                       |
| r =                       | 0.54               | 0.93                        |
| <b>Model 4: FRUE+PETP</b> |                    |                             |
| RUE                       | 1.838              | 1.247                       |
| PETP                      | 2.661              | 5.148                       |
| Genomic (G)               | 0.403              | 0.502                       |
| GxRUE                     | 0.048              | 0.045                       |
| GxPETP                    | 0.050              | 0.131                       |
| Residual                  | 0.811              | 0.186                       |
| Total                     | 5.811              | 7.260                       |
| r =                       | 0.57               | 0.95                        |

**Table 4.** Summary of a variance components and correlation between observed and predicted values ( $r$ ) from a preliminary reaction-norm study involving two envirotyping levels (per environment, by.interval = FALSE; and per time intervals by environment, by.interval=TRUE), for a RNMM model involving additive genomic effects (G) and different structures for environmental covariates (ECs). The  $r$  values were computed using all phenotypic data. Enviromic kinships were build using Gaussian Kernel (gaussian = TRUE).

| Effect per Model          | Envirotyping level |                             |
|---------------------------|--------------------|-----------------------------|
|                           | Environment        | Time Interval × Environment |
| <b>Model 1: FRUE</b>      |                    |                             |
| E = [FRUE]                | 31.974             | 10.131                      |
| Genomic (G)               | 0.470              | 0.530                       |
| GxE                       | 0.104              | 0.182                       |
| Residual                  | 0.076              | 0.161                       |
| Total                     | 32.624             | 11.004                      |
| $r =$                     | 0.99               | 0.96                        |
| <b>Model 2: PETP</b>      |                    |                             |
| E = [PETP]                | 9.104              | 6.059                       |
| Genomic (G)               | 0.446              | 0.517                       |
| GxE                       | 0.124              | 0.155                       |
| Residual                  | 0.230              | 0.195                       |
| Total                     | 9.904              | 6.927                       |
| $r =$                     | 0.93               | 0.94                        |
| <b>Model 3: Joint</b>     |                    |                             |
| E=[FRUE + PETP]           | 12.549             | 7.877                       |
| Genomic (G)               | 0.484              | 0.518                       |
| GxE                       | 0.149              | 0.144                       |
| Residual                  | 0.144              | 0.185                       |
| Total                     | 13.326             | 8.724                       |
| $r =$                     | 0.97               | 0.95                        |
| <b>Model 4: FRUE+PETP</b> |                    |                             |
| RUE                       | 3.172              | 4.860                       |
| PETP                      | 5.500              | 4.203                       |
| Genomic (G)               | 0.538              | 0.553                       |
| GxRUE                     | 0.134              | 0.127                       |
| GxPETP                    | 0.133              | 0.139                       |
| Residual                  | 0.158              | 0.151                       |
| Total                     | 9.635              | 10.033                      |
| $r =$                     | 0.96               | 0.97                        |

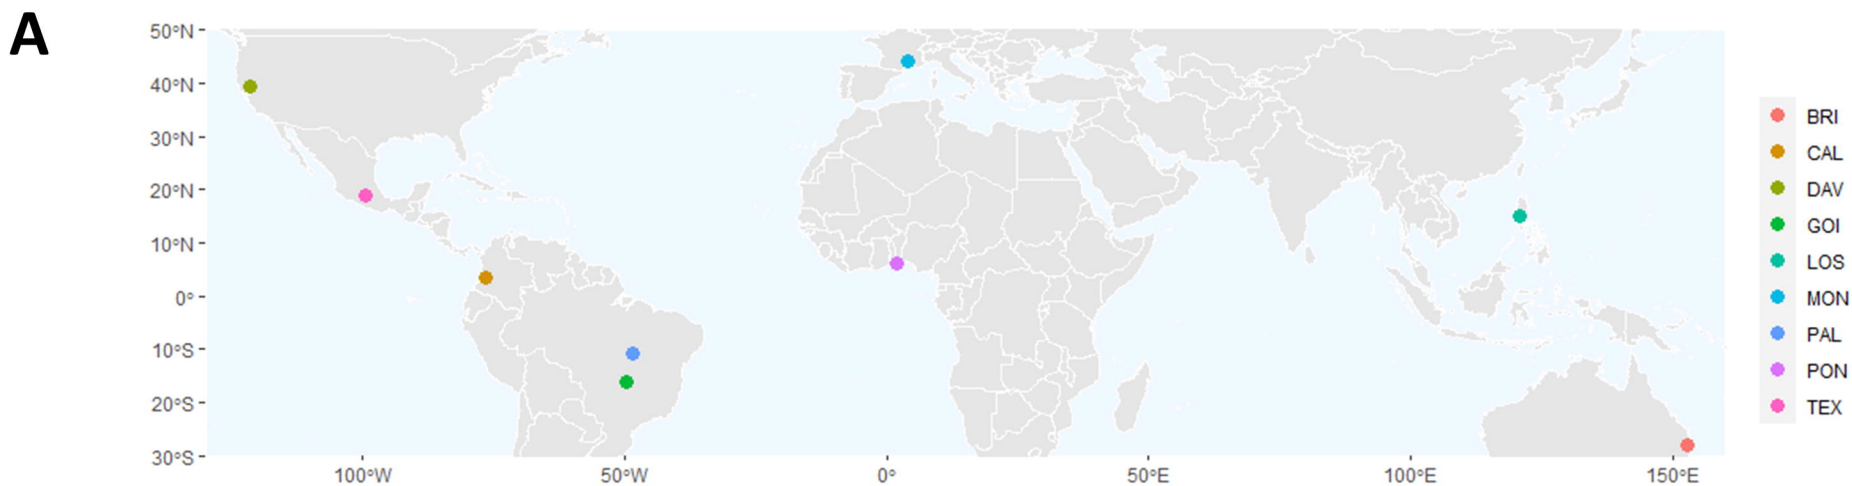

Global Scale-Envirotyping

**B**

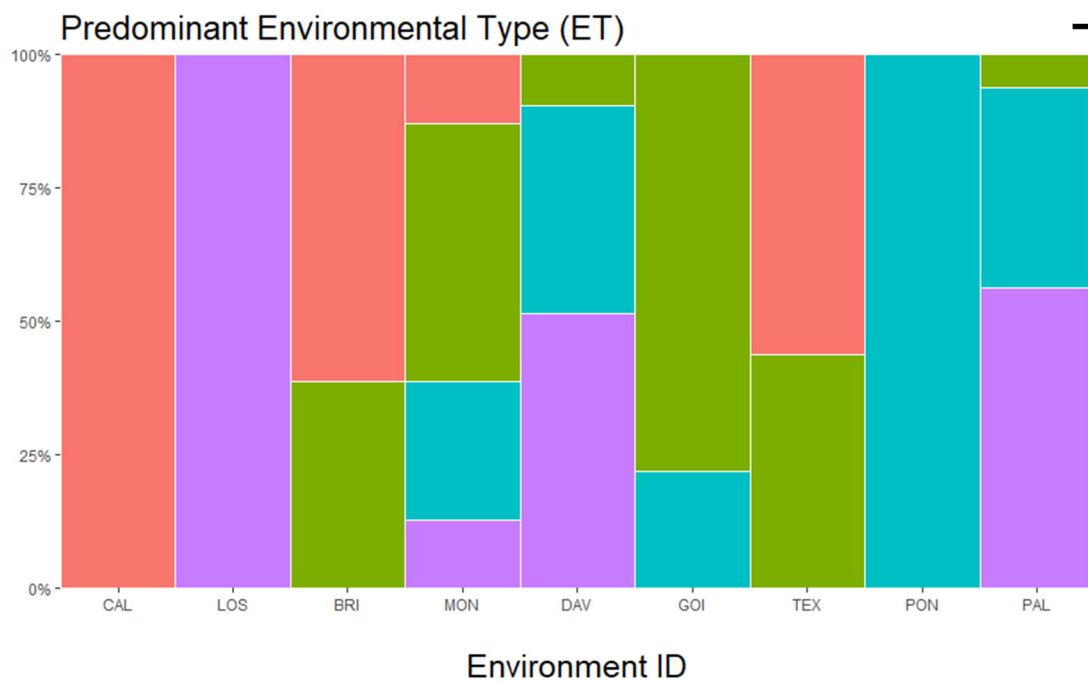

Gaussian Kernel (Distance)

**C**

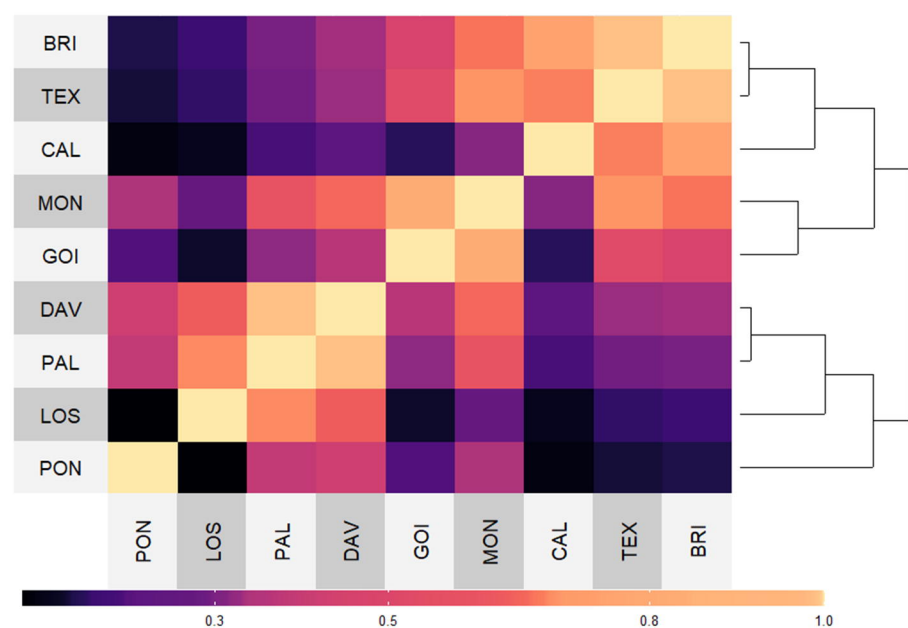

Envirotype ■ T2M\_(15,20] ■ T2M\_(20,23.9] ■ T2M\_(23.9,25.6] ■ T2M\_(25.6,28.9]

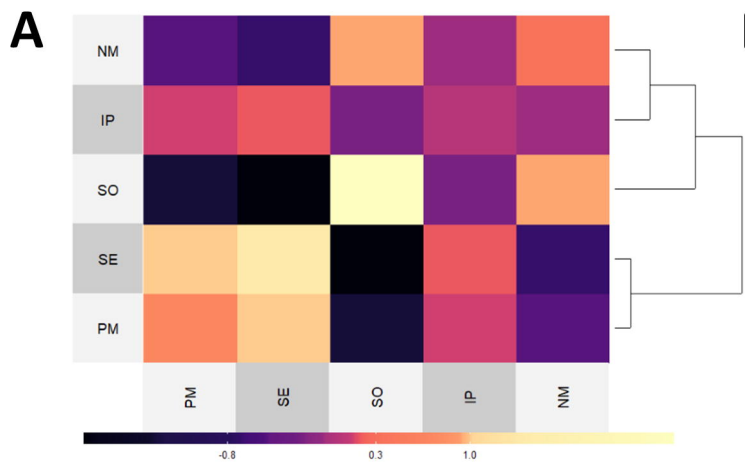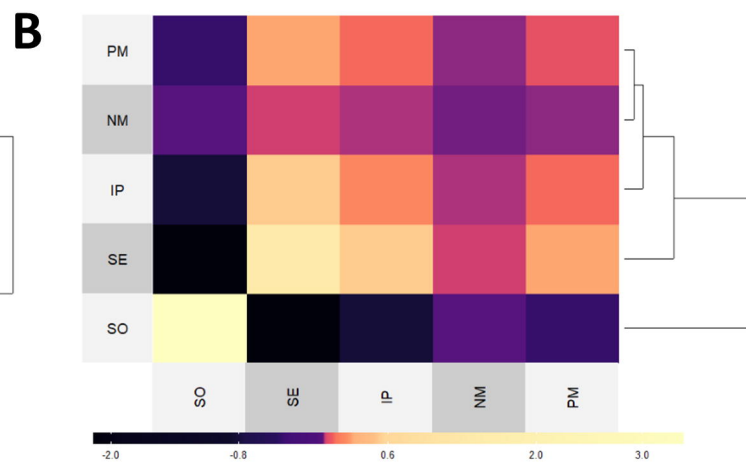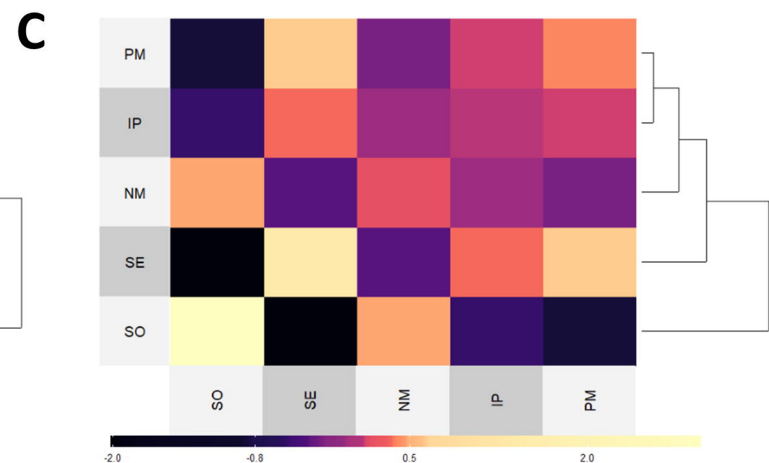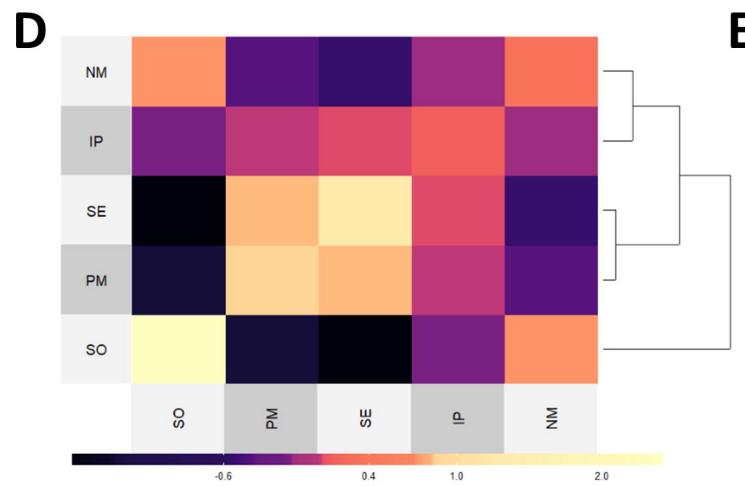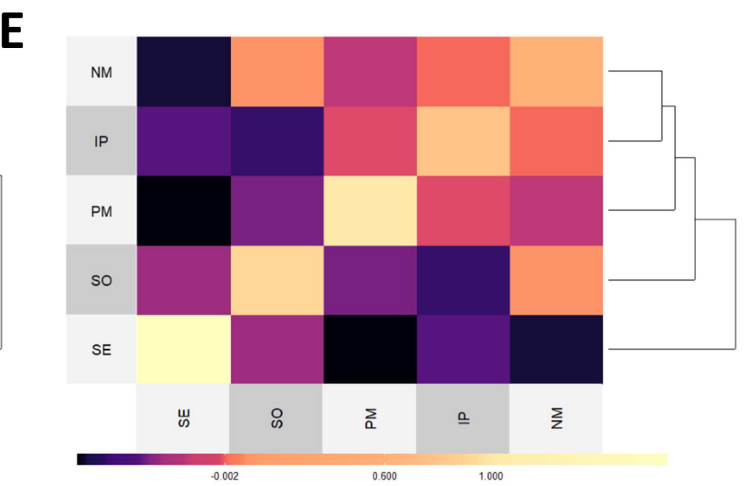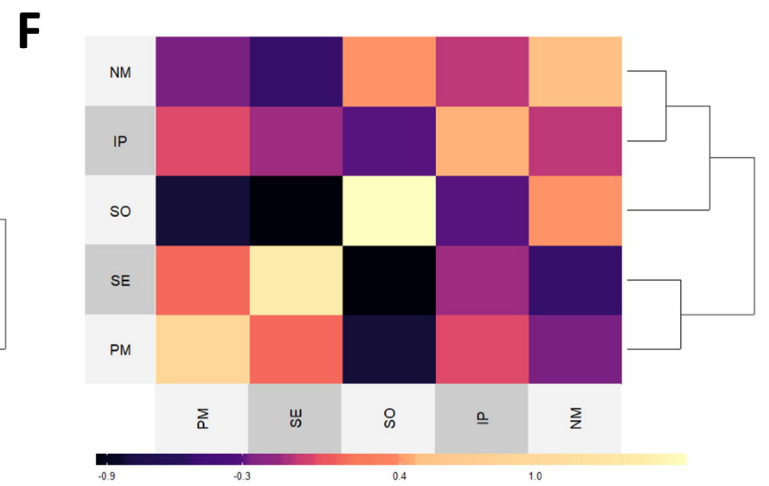



**A**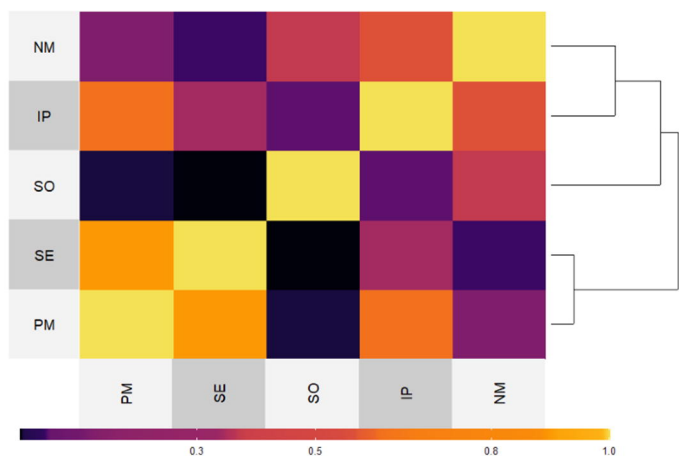**B**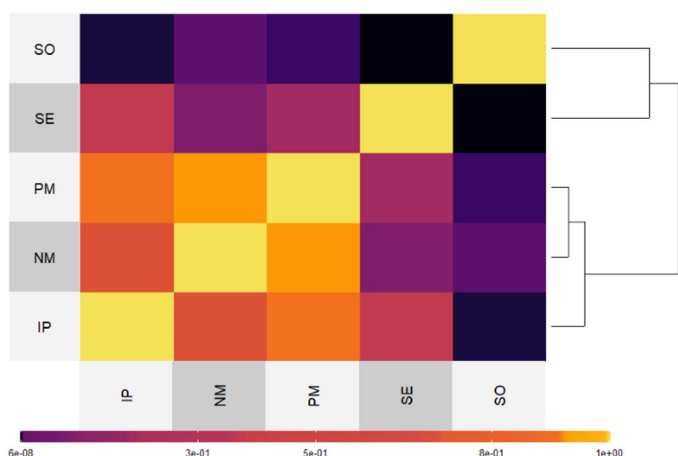**C**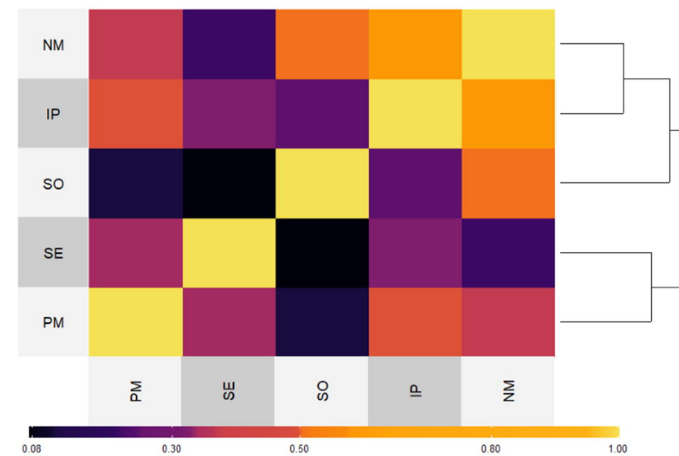**D**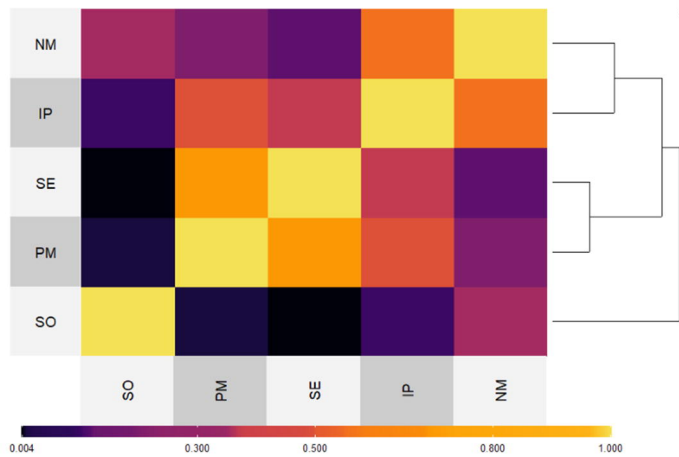**E**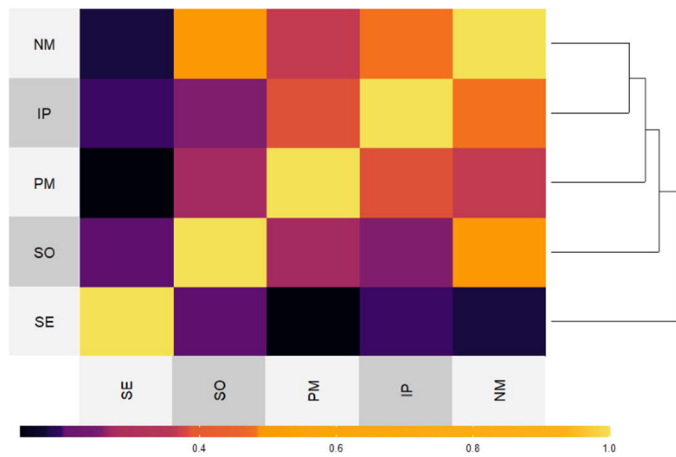**F**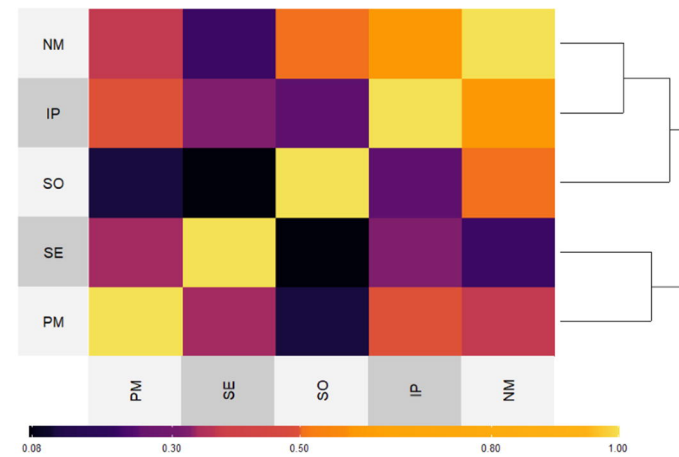

## Remote Data Collection

Orbital Sensors (e.g., from NASA)

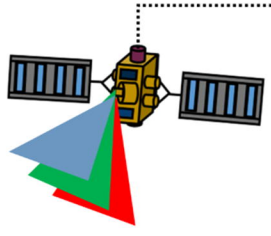

Solid worldwide GIS data bases of environmental data

NasaPower  
WorldClim  
SRTM

- get\_weather()

Raw-environmental data from get\_weather() can be used in the further steps or processed

Raw data

## Data Processing

- processWTH()
- summaryWTH()
- Param\_Atmospheric()
- Param\_Radiation()
- Param\_Temperature()

Data processing involves the quality control and computation of additional variables

Processed data

Ecophysiological variables related to soil-plant-atmosphere dynamics can be computed

## Environmental Characterization

- EnvTyping()
- W.matrix()

Divide time intervals in crop development helps the discovering of envirotype descriptors

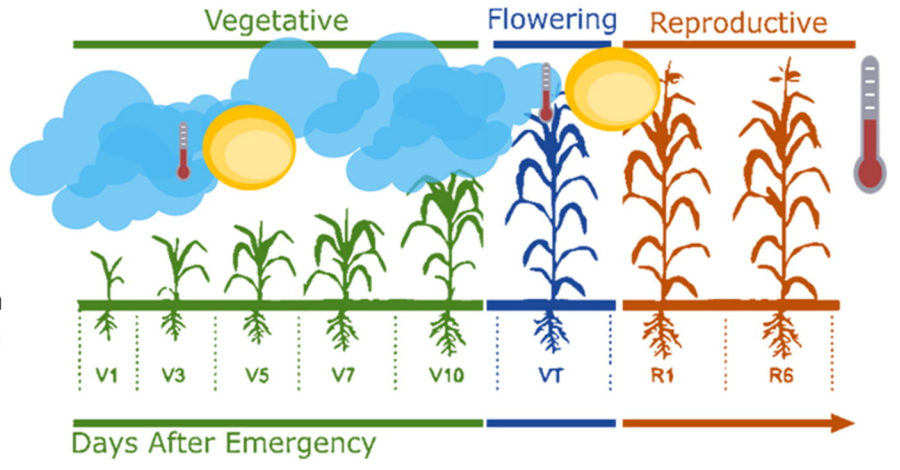

Statistical and ecophysiological criteria are used to translate raw-environmental data in temporal descriptors of the environment

Envirotype descriptors or covariables can be used to estimate similarity and run reaction-norm regressions

## Environmental Similarity

- EnvKernel()

Relatedness across environments derived from envirotyping data can be used to group environments with similar patterns

## Envirotype-based Kinships

- get\_kernel()

Genomic Prediction (GP) models involving:

1. Genotypic Effect GP (MM and MDs)
2. Enviromic-enriched GP (EMM and EMDs)
3. Enviromic-based Reaction-Norm (RNMM and RNMDs)

## Reaction-Norm

Factorial Regression for GxE  
Exploratory analysis

## Environmental Grouping

PCA analysis  
Clustering Environments

## Genomic-based Predictions

Genomic Selection for MET  
Use of BGGE package
